# Supplementary material for: Generative Adversarial Network-driven high-resolution Raman spectral generation for accurate molecular feature recognition
Source: Royal Society of Chemistry journal article supplement (doi:10.1039/d5an00354g), 2025-01-01
Supplement: d5an00354g1.pdf [file d5an00354g1.pdf]

## Supporting Information

# Generative Adversarial Network-driven high-resolution Raman spectral generation for accurate molecular feature recognition

Vikas Yadav,<sup>‡</sup> Abhay Kumar Tiwari,<sup>‡</sup> Soumik Siddhanta,<sup>‡\*</sup>

<sup>‡</sup>*Department of Chemistry, Indian Institute of Technology Delhi, Hauz Khas, New Delhi, India, 110016*

<sup>‡</sup>*SPATIALTY.AI, Tagya Research Private Limited, Rajankunte, Bangalore 560064*

\*Corresponding author e-mail: [soumik@iitd.ac.in](mailto:soumik@iitd.ac.in)

## Table of Contents

|                                                                                                   |      |
|---------------------------------------------------------------------------------------------------|------|
| Section S1: Material and Methods.....                                                             | S-3  |
| S1.1: Raman spectral acquisition.....                                                             | S-3  |
| S1.2: Model building for GAN.....                                                                 | S-3  |
| S1.3: Classification of GAN-generated spectra using Artificial Neural Network (ANN).....          | S-6  |
| S1.4: Identification of the generated spectra of organic compounds via spectral barcode.....      | S-9  |
| S1.5: Calculation of Signal-to-Noise Ratio.....                                                   | S-10 |
| S1.6: Process of making Raman barcode.....                                                        | S-11 |
| Table S1: Raman band assignment table.....                                                        | S-12 |
| Table S2: The model optimization for various parameters.....                                      | S-13 |
| Figure S1: The low and high resolution Raman spectra of samples.....                              | S-20 |
| Figure S2: The additional low-resolution Raman spectra of Aspirin, Ibuprofen, and PCM.....        | S-21 |
| Figure S3: The additional low-resolution Raman spectra of Ranitidine, 4-MBA, and 4-NTP.....       | S-22 |
| Figure S4: PCA loadings from the different sample classes.....                                    | S-23 |
| Figure S5: Architecture of the ANN classification neural network.....                             | S-23 |
| Table S3: Best optimized model for ANN classification.....                                        | S-24 |
| Figure S6: Confusion matrices for ANN classification model on high-resolution data.....           | S-25 |
| Figure S7: ROC of ANN classification network.....                                                 | S-26 |
| Figure S8: Confusion matrices for ANN classification model on GAN-generated data.....             | S-27 |
| Figure S9: Confusion matrices for other ANN model on GAN-generated data.....                      | S-28 |
| Figure S10: Confusion matrices for other ANN model on GAN-generated data.....                     | S-29 |
| Figure S11: The transformation of additional low-resolution Raman spectra to high-resolution..... | S-30 |
| Figure S12: The GAN model efficiency towards sample-out case.....                                 | S-32 |
| Table S4: Signal-to-Noise Ratio of Raman spectra.....                                             | S-32 |
| Figure S13: The process of making Raman barcode.....                                              | S-33 |
| Table S5: Average similarity index of low-resolution Raman .....                                  | S-34 |
| Table S6: Standard deviation of SSIM of low-resolution Raman.....                                 | S-34 |
| Table S7: Average similarity index of GAN-generated Raman.....                                    | S-35 |
| Table S8: Standard deviation of SSIM GAN-generated Raman.....                                     | S-35 |
| Figure S14: RadViz clustering between low, high, and GAN-generated Raman.....                     | S-36 |

## Section S1: Material and Methods

### S1.1: Raman spectral acquisition

The LR spectrometer possesses an approximate resolution of  $31\text{ cm}^{-1}$ , featuring a grating with 150 lines per millimeter and incorporating a linear CCD array. The collection optics involved an Integrated Photonics System optical fiber probe coupled to a 785 nm laser (model: I0785SP100-T040S). The Raman probe has a central fiber for light input and is surrounded by six fiber endings to collect the scattered light. A ball lens is mounted to focus the light into the sample and collect the reflected light. The focal length of this probe is 4 mm. Raman spectra were acquired from aspirin, ibuprofen, paracetamol, ranitidine, 4-MBA, and 4-NTP. Approximately 400 Raman spectra were collected from each sample at different positions to account for spectral variability. Another set of high-resolution spectra was collected using the high-resolution Andor spectrophotometer (HR spectrometer) (Kymera 328i, with quad turret, 328 mm focal length, F/4.1 aperture having CCD camera with resolution  $< 1\text{ cm}^{-1}$ , grating 1800 lines/mm) with similar acquisition setting, i.e., using a 785 nm laser with acquisition time of 15 s and three accumulations, and 1800 lines/mm grating system. All Raman spectra were calibrated against the first-order silicon phonon mode at  $520.7\text{ cm}^{-1}$  to ensure alignment of the wavenumber axis across both low-resolution and high-resolution datasets. The calibration accuracy was within  $\pm 1\text{ cm}^{-1}$ , which is negligible compared to the spectral resolution difference between instruments ( $31\text{ cm}^{-1}$ ). This calibration step ensured that GAN training was not affected by systematic shifts in peak positions, thereby preserving the fidelity of spectral reconstruction. We also accumulated 400 Raman spectra from each sample using the HR spectrometer. A series of spectra were recorded from each sample to create a comprehensive dataset for training the GAN. Care was taken to minimize external interferences, and all measurements were conducted in a controlled environment to maintain consistency. We have accumulated the spectrum from 200 nm to 1650 nm with 862 wavenumber points in between. All the spectra were first normalized and used as input for the ML model.

## S1.2: Model builder for GAN

The GAN model employed in this study consisted of a generator network built upon the U-Net architecture with eight blocks, each comprising convolutional layers, instance normalization layers, LeakyReLU layers, and tanh activation functions.<sup>1</sup> Low-resolution spectra collected with an integration time of 15 s using an LR spectrometer were used as the input data for the generator. The generator network consists of multiple convolutional layers designed to capture the most valuable features and spatial hierarchies in the input data. It is a combination of an encoder and a decoder structure containing skip connection layers. The generator is crucial in transforming low-resolution Raman spectra into their high-resolution counterparts.<sup>2</sup> Since the generator is a U-Net-based design, it first down-samples all the information from the low-resolution Raman spectra to lower dimensional space through convolutional layers. Once the network extracts these valuable features, it starts upscaling and rebuilds the fully resolved high-resolution Raman spectra using extracted features. The discriminator is a five-block network and is composed of convolutional layers aimed at discerning between the real and the generated data. It also employs layers of convolutional, batch normalization, and Leaky ReLU. All convolutional layers utilize  $4\times 1$  spatial filters applied with a stride of size 2. The output layer of the generator and discriminator has  $1\times 1$  spatial filters applied with a stride of size 1, followed by the Tanh activation function for the generator and the sigmoid activation function for the discriminator. While the core structure of the GAN follows conventional GAN architectures, our approach lies in the specific application to Raman spectral data. We have optimized the network design for spectral resolution enhancement, tailoring convolutional layers to capture the unique features of low-resolution Raman spectra and optimized training parameters to ensure rapid convergence and high-resolution spectral generation.

Training parameters such as the learning rate, batch size, and epochs were carefully selected to optimize model performance. The model is trained over multiple epochs and tries to optimize the losses. The adversarial training process involved a competitive interplay between the generator and discriminator, with the former generating spectra to deceive the latter and the discriminator evolving to discern true high-resolution spectra. The rigorous evaluation

included generalization of performance on unseen spectra, quantitative metrics like SNR, spectral resolution, and peak intensity, and comparative analyses against spectra obtained directly from a high-resolution Raman spectrophotometer.

To train the GAN model, we employed a supervised learning strategy by partitioning the complete dataset of 2400 Raman spectra into three distinct subsets. Specifically, 70% of the data (1680 spectra) was allocated for training, enabling the model to learn the mapping between low-resolution and high-resolution spectral domains. To optimize the learning process and prevent overfitting, 15% of the data (360 spectra) was reserved as a validation set and used to monitor model performance during training iterations. Once training was complete, the remaining 15% (360 spectra) was utilized as an independent test set to evaluate the generalization capability of the model on previously unseen spectral inputs. During the training process, the model tries to adjust its weight and biases in the layer, as well as these losses from both the generator and the discriminator. The loss function,  $L_G$  from the generator network, measures how significantly the generator can deceive the discriminator network. The generator aims to minimize this loss ( $L_G$ ) during the training process to effectively generate outputs indistinguishable from real high-resolution spectra. The loss function,  $L_D$ , from the discriminator network measures the discriminator's ability to classify between real and generated spectra. The discriminator aims to maximize this loss ( $L_D$ ), improving its capability to differentiate between real and generated data. The parameters G and D in the loss functions represent the weights and biases, which are iteratively updated during training to improve the efficiency accuracy for the generator and discriminator network, respectively. The interplay between  $L_G$  and  $L_D$  creates a dynamic training process where the generator and discriminator compete to continuously improve in a zero-sum game framework. The loss functions in the GAN model come from both generator ( $L_G$ ) and discriminator ( $L_D$ ) and were defined as<sup>2</sup>

$$L_G = \frac{1}{N} \sum_{n=1}^N (D(G(s^n), s^n) - 1)^2 + \lambda \|G(s^n) - x^n\|_1$$

$$L_D = \frac{1}{N} \sum_{n=1}^N (D(x^n, s^n) - 1)^2 + (D(G(s^n), s^n))^2$$

Where a high-resolution spectrum is denoted as  $x^n$  and a corresponding low-resolution spectrum is denoted as  $s^n$ ,  $N$  is the number of training spectra. The hyperparameter  $\lambda$  was introduced to control the magnitude of the L1 norm, a metric used to quantify the dissimilarity between vectors.<sup>2</sup> L1 norm was chosen to improve the SNR of the processed spectra. To train our model, we employed the Adam optimization algorithm over 177 epochs, with a learning rate of 0.0001 and an effective batch size of one.<sup>3</sup> These parameters were selected to optimize the model's performance in reconstructing high-resolution spectra from their low-resolution counterparts.

Due to the architectural complexity of the proposed GAN model comprising a deep convolutional generator and discriminator with a large number of trainable parameters, the training process is computationally intensive. The model was trained over approximately 164 hours on a high-performance computing (HPC) cluster utilizing two parallel GPU nodes, each equipped with NVIDIA A100 GPUs (40 GB VRAM) and 2× Intel Xeon Platinum 8358 CPUs (32 cores, 2.6 GHz, 8 CPUs). However, once the training phase is completed, the model demonstrates high inference efficiency. Specifically, it requires only ~88 milliseconds to generate a high-resolution Raman spectrum from a single low-resolution input of array size 862×1. Furthermore, the inference time scales linearly with the input array size, making the model well-suited for real-time or high-throughput spectral enhancement applications.

### S1.3: Classification of GAN-generated spectra using Artificial Neural Network (ANN)

We employed an ANN architecture to classify the generated data and tuned the hyperparameters such as layer size, number of hidden neurons in each layer, and training function. The best classification model after optimization of the parameters is the ANN comprised of four layers: an input layer, two hidden layers with 17 and 18 neurons, respectively, and an output classification layer with six nodes corresponding to the categories of the samples (**Figure S1**). The evaluation of the individual models is given in **Table S2**. The ANN model in this study utilized the Bayesian regularization backpropagation algorithm for training, which iteratively updates the weights and biases based on the Levenberg-Marquardt optimization.<sup>4</sup> Specifically, we employed the 'trainbr' function and assessed network performance using cross-entropy error and misclassification error metrics.<sup>5,6</sup>

Cross-entropy loss, also known as log loss, measures the performance of a classification model whose output is a probability value between 0 and 1. The cross-entropy loss increases as the predicted probability diverges from the actual label. In essence, it quantifies the difference between two probability distributions—the true labels and the predicted probabilities. For single-label classification, the cross-entropy loss is calculated as:

$$loss = -\frac{1}{N} \sum_{i=1}^N \sum_{c=1}^C T_{ic} \ln Y_{ic}$$

Where N is the number of samples,  $T_{ic}$  is the binary indicator (0 or 1) that corresponds to whether the class label  $c$  is the correct classification for the  $i^{th}$  sample, and  $Y_{ic}$  is the predicted probability of the  $i^{th}$  sample being in class  $c$ . The misclassification error metric measures the proportion of incorrect predictions made by the model, i.e., it calculates the ratio of the number of incorrect predictions to the total number of predictions and is given by the following equation:

$$E = \frac{1}{N} \sum_{i=1}^N I(\hat{y}_i \neq y_i)$$

Where  $N$  is the total number of samples,  $\hat{y}_i$  is the predicted label, and  $y_i$  is the true label for the  $i^{th}$  sample.

During the training state of the ANN model, we set the minimum performance gradient to  $1 \times 10^{-6}$  and the maximum validation failure to 6. This means that if the performance of the model does not change by a margin of  $1 \times 10^{-6}$  for six successive epochs, training will stop immediately. Upon satisfying these convergence criteria, the model is considered fully trained and ready for testing and validation. To ensure the reliability of our classification model, we conducted a 3-fold validation process by randomly partitioning the dataset into training, testing, and validation subsets. The input data was normalized, and no additional preprocessing steps were applied to promote the generalization of the model. Since we have a substantial dataset, we utilized the entire Raman spectrum without augmentation for both training and testing. High-resolution data was used to train the model. Once the model was trained, it was further tested on the generated high-resolution dataset to assess its performance. The model optimization was based on minimizing mean square error (MSE) and maximizing the coefficient of correlation (R). Convergence criteria for the model were determined by monitoring changes in MSE and R over successive iterations, with the training concluding once a predefined threshold was reached and remained unchanged for a specified number of iterations. The results were further analyzed through visualization techniques, such as confusion matrices and receiver operating characteristic (ROC) curves. Lastly, MATLAB scripts were generated to replicate the results and enable customization of the training process, ensuring reproducibility and flexibility in future experiments.

The MSE for the classification model was calculated as follows:

$$MSE = \frac{1}{n} \sum_{i=1}^n (X_i - \hat{X}_i)^2$$

Wherein  $n$  is the number of total observations,  $X_i$  is the true class of the sample, and  $\hat{X}_i$  is the class of the sample predicted by the model.

Although classifiers such as Support Vector Machine (SVM), k-nearest Neighbours (k-NN), Random Forest (RF), and Gradient Boosting Machines (GBM) can be used, the ANN method was opted over others because of the complex non-linear relationships inherent in Raman spectra, which might be challenging for linear models. ANNs can automatically learn features from raw data, reducing the need for manual feature extraction.<sup>7</sup> Beyond classification accuracy, efforts were made for post-training interpretability, employing feature analysis and visualization techniques to gain insights into the distinctive spectral attributes defining different sample categories. For the visualization of different categories of samples, we first used Principal Component Analysis (PCA) to reduce the data from higher to lower dimensions. After that, the scores obtained from the PCA were directly incorporated into the Radial Visualization (RadViz) in Orange software.

#### S1.4: Identification of the generated spectra of organic compounds via spectral barcoding

To enable compound classification and automated identification, we adopted the concept of Raman barcoding for the analyte molecules. A comprehensive Raman spectral barcode library was initially constructed using the experimentally obtained Raman spectra from the HR spectrometer. The high-resolution Raman spectra obtained were processed in such a way that all information regarding peak position and full-width half maxima (FWHM) was integrated into the form of barcodes. The thickness and position of vertical lines are directly related to the spectral peak position and FWHM, respectively. An in-house MATLAB script was developed to preprocess the high-resolution spectra into their respective barcodes. Initially, spectral normalization was performed within the intensity range of 0 to 1. Subsequently, a peak searching algorithm identifies peaks in the Raman spectrum based on peak prominence using the "findpeaks" function. Raman barcodes were employed to verify the identity of the

unknown sample through barcode comparison. We opted for the Structural Similarity Index (SSIM) method to measure the similarity between two barcodes. The significance of SSIM lies in its ability to provide a more accurate and human-perceptual measure of image similarity, making it particularly useful in fields such as image processing, computer vision, and remote sensing. SSIM provides a robust and perceptually relevant measure of image similarity, leveraging the structural information within images to offer a meaningful comparison metric. SSIM compares two images,  $I$  and  $I'$ , by considering three components: luminance ( $l$ ), contrast ( $c$ ), and structure ( $s$ ). The SSIM index is calculated using the following formula:<sup>8</sup>

$$SSIM(I, I') = [l(I, I')]^\alpha \cdot [c(I, I')]^\beta \cdot [s(I, I')]^\gamma$$

If a significant portion of the barcode signature of the unknown sample matched with the barcode spectrum from the library, i.e.,  $X$ , then the unknown sample was identified as  $X$ . The threshold percentage of the unknown sample barcode spectrum required for identification is referred to as the percentage match criterion. Subsequently, low-resolution Raman spectra were fed into a GAN model to generate high-resolution spectral outputs. These generated spectra were then encoded into Raman barcodes and compared against the spectral library to determine the similarity, quantified as a percentage match between the unknown sample's Raman barcode and those in the library. Upon scanning the entire library, the model identified the top-scoring profiles, thereby providing the identity of the unknown sample.

If a significant portion of the barcode signature of the unknown sample matched with the barcode spectrum from the library, i.e.,  $X$ , then the unknown sample was identified as  $X$ . The threshold percentage of the unknown sample barcode spectrum required for identification is referred to as the percentage match criterion. Subsequently, low-resolution Raman spectra were fed into a GAN model to generate high-resolution spectral outputs. These generated spectra were then encoded into Raman barcodes and compared against the spectral library to determine the similarity, quantified as a percentage match between the unknown sample's

Raman barcode and those in the library. Upon scanning the entire library, the model identified the top-scoring profiles, thereby providing the identity of the unknown sample.

### S1.5: Calculating of Signal-to-Noise Ratio

The SNR for the low, high, and generated high-resolution Raman spectra were calculated by the formula below:<sup>9</sup>

$$SNR = \frac{\text{Raman Peak Intensity}}{\text{Standard deviation of background noise}}$$

$$SNR (dB) = 10 \log_{10}(SNR)$$

### S1.6: Process of making Raman spectral barcode

For the barcoding process, we employed the "findpeaks" function in MATLAB, utilizing a peak prominence threshold set at 0.3, indicating that peaks with an SNR of 0.3 or higher are considered valid peaks within the Raman spectrum, discernible from the background noise. Once all peaks within the Raman spectrum and their FWHM values were identified and labeled, an in-house MATLAB algorithm was developed to fetch this information and integrate it into constructing the Raman barcode. Since Raman is a very sensitive technique for the detection of a sample, and every sample has a distinct Raman fingerprint region, the Raman barcode will be a unique identity that is assigned to the sample on the basis of Raman spectra. Consequently, each barcode encapsulates specific information unique to each sample, facilitating streamlined identification of unknown samples. We have created a spectral barcode library using high-resolution Raman spectra obtained from a high-resolution spectrometer. Given that the GAN has successfully transformed low-resolution Raman spectra into their high-resolution equivalents. The identifier then uses these generated high-resolution spectra to extract the FWHM and peak positions, converting them into Raman barcodes. These barcodes are subsequently scanned against the Raman spectral barcode library, and the resulting matrix represents the percentage similarity index. We use the built-

in MATLAB function 'SSIM' to calculate the similarity index of the barcode from an unknown sample against the spectral library.

**Table S1:** Raman band assignment of different samples: aspirin, ibuprofen, PCM, ranitidine, 4-MBA, and 4-NTP.<sup>10,11,12,13,14</sup>

| Raman Shift (cm <sup>-1</sup> ) | Raman band assignment                 |
|---------------------------------|---------------------------------------|
| 1030                            | Aromatic rings                        |
| 1200                            | -OH group substitution                |
| 1300                            | C-C bond                              |
| 1600                            | C=O stretching                        |
| 700-830                         | $\gamma$ C-H                          |
| 1231                            | C-C ring stretching                   |
| 858                             | Ring breathing                        |
| 791                             | CNC ring stretching                   |
| 1319                            | Amide III                             |
| 1558                            | Amide II N-H in plane deformation     |
| 1607                            | skeletal aryl C-C ring stretching     |
| 1644                            | Amide I                               |
| 841                             | out-of-plane C-H bending              |
| 1441, 1472                      | aryl C-C stretch                      |
| 1511                            | aryl C-H symmetric bends              |
| 1587                            | NO <sub>2</sub> asymmetric stretching |
| 1554, 1408                      | NO <sub>2</sub> symmetric stretching  |
| 1483, 1376                      | C-N symmetric stretching              |
| 1450                            | C-C symmetric stretching              |
| 1306                            | C-H in-plane bending                  |
| 1263, 1248                      | C-H out of plane bending              |

**Table S2:** The model optimization table for various parameters.

| Model No. | Training Function | Hidden Neurons | Test Loss | Model No. | Training Function | Hidden Neurons | Test Loss |
|-----------|-------------------|----------------|-----------|-----------|-------------------|----------------|-----------|
| 1         | trainlm           | [6]            | 0.025981  | 45        | trainlm           | [8, 19]        | 0.02637   |
| 2         | trainlm           | [3, 6]         | 0.028332  | 46        | trainlm           | [8, 20]        | 0.027906  |
| 3         | trainlm           | [4, 6]         | 0.026843  | 47        | trainlm           | [9, 10]        | 0.021962  |
| 4         | trainlm           | [4, 10]        | 0.029288  | 48        | trainlm           | [9, 11]        | 0.021414  |
| 5         | trainlm           | [4, 11]        | 0.029144  | 49        | trainlm           | [9, 13]        | 0.023985  |
| 6         | trainlm           | [4, 12]        | 0.023078  | 50        | trainlm           | [9, 15]        | 0.023128  |
| 7         | trainlm           | [4, 15]        | 0.029084  | 51        | trainlm           | [9, 16]        | 0.024728  |
| 8         | trainlm           | [5, 10]        | 0.026997  | 52        | trainlm           | [9, 17]        | 0.027728  |
| 9         | trainlm           | [5, 11]        | 0.024478  | 53        | trainlm           | [9, 18]        | 0.023069  |
| 10        | trainlm           | [5, 12]        | 0.023113  | 54        | trainlm           | [9, 19]        | 0.022849  |
| 11        | trainlm           | [5, 13]        | 0.02859   | 55        | trainlm           | [10, 14]       | 0.029717  |
| 12        | trainlm           | [5, 14]        | 0.027967  | 56        | trainlm           | [10, 15]       | 0.026676  |
| 13        | trainlm           | [5, 16]        | 0.029415  | 57        | trainlm           | [10, 17]       | 0.029091  |
| 14        | trainlm           | [5, 18]        | 0.024838  | 58        | trainlm           | [10, 20]       | 0.01982   |
| 15        | trainlm           | [5, 19]        | 0.027732  | 59        | trainlm           | [11, 14]       | 0.023211  |
| 16        | trainlm           | [5, 20]        | 0.028819  | 60        | trainlm           | [11, 15]       | 0.025901  |
| 17        | trainlm           | [6, 7]         | 0.02589   | 61        | trainlm           | [11, 16]       | 0.022485  |
| 18        | trainlm           | [6, 9]         | 0.025331  | 62        | trainlm           | [11, 17]       | 0.024967  |
| 19        | trainlm           | [6, 10]        | 0.022424  | 63        | trainlm           | [11, 18]       | 0.027611  |
| 20        | trainlm           | [6, 11]        | 0.022461  | 64        | trainlm           | [11, 19]       | 0.025603  |
| 21        | trainlm           | [6, 12]        | 0.022132  | 65        | trainlm           | [11, 20]       | 0.027897  |
| 22        | trainlm           | [6, 13]        | 0.02589   | 66        | trainlm           | [12, 14]       | 0.022319  |
| 23        | trainlm           | [6, 14]        | 0.02808   | 67        | trainlm           | [12, 16]       | 0.019906  |
| 24        | trainlm           | [6, 15]        | 0.021693  | 68        | trainlm           | [12, 17]       | 0.026521  |
| 25        | trainlm           | [6, 16]        | 0.021657  | 69        | trainlm           | [12, 18]       | 0.022467  |
| 26        | trainlm           | [6, 17]        | 0.024102  | 70        | trainlm           | [12, 19]       | 0.022086  |
| 27        | trainlm           | [6, 18]        | 0.028086  | 71        | trainlm           | [13, 16]       | 0.027623  |
| 28        | trainlm           | [6, 19]        | 0.02007   | 72        | trainlm           | [13, 17]       | 0.024226  |
| 29        | trainlm           | [6, 20]        | 0.018801  | 73        | trainlm           | [13, 20]       | 0.029899  |
| 30        | trainlm           | [7, 9]         | 0.024369  | 74        | trainlm           | [14, 15]       | 0.029871  |
| 31        | trainlm           | [7, 10]        | 0.022259  | 75        | trainlm           | [14, 16]       | 0.018615  |
| 32        | trainlm           | [7, 11]        | 0.027534  | 76        | trainlm           | [14, 17]       | 0.026844  |
| 33        | trainlm           | [7, 12]        | 0.023687  | 77        | trainlm           | [15, 16]       | 0.026204  |
| 34        | trainlm           | [7, 13]        | 0.024874  | 78        | trainlm           | [15, 17]       | 0.025169  |
| 35        | trainlm           | [7, 14]        | 0.024143  | 79        | trainlm           | [16, 18]       | 0.019279  |
| 36        | trainlm           | [7, 16]        | 0.025499  | 80        | trainlm           | [16, 20]       | 0.026439  |
| 37        | trainlm           | [7, 18]        | 0.02622   | 81        | trainlm           | [17, 18]       | 0.029288  |
| 38        | trainlm           | [7, 19]        | 0.022173  | 82        | trainlm           | [17, 20]       | 0.022176  |
| 39        | trainlm           | [8, 9]         | 0.024886  | 83        | trainlm           | [18, 19]       | 0.027043  |
| 40        | trainlm           | [8, 10]        | 0.019097  | 84        | trainlm           | [3, 4, 7]      | 0.024825  |
| 41        | trainlm           | [8, 13]        | 0.025541  | 85        | trainlm           | [3, 4, 20]     | 0.028591  |
| 42        | trainlm           | [8, 14]        | 0.026174  | 86        | trainlm           | [3, 5, 16]     | 0.029862  |
| 43        | trainlm           | [8, 15]        | 0.028847  | 87        | trainlm           | [3, 6, 17]     | 0.024444  |
| 44        | trainlm           | [8, 17]        | 0.028759  | 88        | trainlm           | [3, 7, 12]     | 0.027207  |

| Model No. | Training Function | Hidden Neurons | Test Loss | Model No. | Training Function | Hidden Neurons | Test Loss |
|-----------|-------------------|----------------|-----------|-----------|-------------------|----------------|-----------|
| 89        | trainlm           | [3, 10, 12]    | 0.023092  | 133       | trainlm           | [4, 12, 13]    | 0.023064  |
| 90        | trainlm           | [3, 11, 15]    | 0.028372  | 134       | trainlm           | [4, 12, 14]    | 0.021336  |
| 91        | trainlm           | [3, 11, 18]    | 0.028773  | 135       | trainlm           | [4, 12, 15]    | 0.022402  |
| 92        | trainlm           | [3, 12, 17]    | 0.029499  | 136       | trainlm           | [4, 12, 16]    | 0.023035  |
| 93        | trainlm           | [3, 13, 20]    | 0.02803   | 137       | trainlm           | [4, 12, 17]    | 0.022225  |
| 94        | trainlm           | [3, 14, 16]    | 0.029983  | 138       | trainlm           | [4, 12, 18]    | 0.027938  |
| 95        | trainlm           | [3, 14, 19]    | 0.026622  | 139       | trainlm           | [4, 12, 19]    | 0.027287  |
| 96        | trainlm           | [3, 15, 16]    | 0.028687  | 140       | trainlm           | [4, 12, 20]    | 0.022275  |
| 97        | trainlm           | [3, 16, 17]    | 0.02784   | 141       | trainlm           | [4, 13, 14]    | 0.02507   |
| 98        | trainlm           | [3, 18, 20]    | 0.027252  | 142       | trainlm           | [4, 13, 20]    | 0.021553  |
| 99        | trainlm           | [3, 19, 20]    | 0.026676  | 143       | trainlm           | [4, 14, 16]    | 0.026146  |
| 100       | trainlm           | [4, 5, 9]      | 0.027233  | 144       | trainlm           | [4, 14, 17]    | 0.024048  |
| 101       | trainlm           | [4, 5, 15]     | 0.022009  | 145       | trainlm           | [4, 14, 18]    | 0.021127  |
| 102       | trainlm           | [4, 5, 17]     | 0.021853  | 146       | trainlm           | [4, 14, 20]    | 0.023905  |
| 103       | trainlm           | [4, 5, 20]     | 0.021913  | 147       | trainlm           | [4, 15, 17]    | 0.023299  |
| 104       | trainlm           | [4, 6, 7]      | 0.028072  | 148       | trainlm           | [4, 15, 18]    | 0.026942  |
| 105       | trainlm           | [4, 6, 11]     | 0.029618  | 149       | trainlm           | [4, 15, 19]    | 0.025296  |
| 106       | trainlm           | [4, 6, 12]     | 0.024806  | 150       | trainlm           | [4, 15, 20]    | 0.026287  |
| 107       | trainlm           | [4, 6, 16]     | 0.028125  | 151       | trainlm           | [4, 16, 17]    | 0.028423  |
| 108       | trainlm           | [4, 6, 18]     | 0.027009  | 152       | trainlm           | [4, 16, 18]    | 0.022115  |
| 109       | trainlm           | [4, 7, 8]      | 0.024657  | 153       | trainlm           | [4, 16, 19]    | 0.020908  |
| 110       | trainlm           | [4, 7, 9]      | 0.02925   | 154       | trainlm           | [4, 16, 20]    | 0.021028  |
| 111       | trainlm           | [4, 7, 10]     | 0.027788  | 155       | trainlm           | [4, 17, 20]    | 0.024154  |
| 112       | trainlm           | [4, 7, 11]     | 0.026738  | 156       | trainlm           | [4, 18, 19]    | 0.019465  |
| 113       | trainlm           | [4, 7, 13]     | 0.028909  | 157       | trainlm           | [4, 19, 20]    | 0.020579  |
| 114       | trainlm           | [4, 7, 18]     | 0.023425  | 158       | trainlm           | [5, 6, 8]      | 0.026558  |
| 115       | trainlm           | [4, 8, 11]     | 0.022378  | 159       | trainlm           | [5, 6, 11]     | 0.028853  |
| 116       | trainlm           | [4, 8, 12]     | 0.025057  | 160       | trainlm           | [5, 6, 12]     | 0.019281  |
| 117       | trainlm           | [4, 8, 14]     | 0.028675  | 161       | trainlm           | [5, 6, 13]     | 0.021773  |
| 118       | trainlm           | [4, 8, 15]     | 0.027409  | 162       | trainlm           | [5, 6, 18]     | 0.024057  |
| 119       | trainlm           | [4, 8, 18]     | 0.025703  | 163       | trainlm           | [5, 7, 8]      | 0.029874  |
| 120       | trainlm           | [4, 9, 11]     | 0.024389  | 164       | trainlm           | [5, 7, 9]      | 0.026643  |
| 121       | trainlm           | [4, 9, 12]     | 0.029705  | 165       | trainlm           | [5, 7, 12]     | 0.019883  |
| 122       | trainlm           | [4, 9, 14]     | 0.02381   | 166       | trainlm           | [5, 7, 14]     | 0.027047  |
| 123       | trainlm           | [4, 9, 15]     | 0.023733  | 167       | trainlm           | [5, 7, 15]     | 0.025317  |
| 124       | trainlm           | [4, 9, 16]     | 0.026554  | 168       | trainlm           | [5, 7, 16]     | 0.025411  |
| 125       | trainlm           | [4, 9, 18]     | 0.025992  | 169       | trainlm           | [5, 7, 17]     | 0.029508  |
| 126       | trainlm           | [4, 9, 19]     | 0.025909  | 170       | trainlm           | [5, 7, 18]     | 0.028147  |
| 127       | trainlm           | [4, 10, 15]    | 0.019944  | 171       | trainlm           | [5, 7, 20]     | 0.02521   |
| 128       | trainlm           | [4, 10, 20]    | 0.028791  | 172       | trainlm           | [5, 8, 9]      | 0.01958   |
| 129       | trainlm           | [4, 11, 13]    | 0.027324  | 173       | trainlm           | [5, 8, 11]     | 0.025317  |
| 130       | trainlm           | [4, 11, 16]    | 0.02285   | 174       | trainlm           | [5, 8, 14]     | 0.028328  |
| 131       | trainlm           | [4, 11, 17]    | 0.02681   | 175       | trainlm           | [5, 8, 16]     | 0.025291  |
| 132       | trainlm           | [4, 11, 20]    | 0.024606  | 176       | trainlm           | [5, 8, 17]     | 0.028868  |

| Model No. | Training Function | Hidden Neurons | Test Loss | Model No. | Training Function | Hidden Neurons | Test Loss |
|-----------|-------------------|----------------|-----------|-----------|-------------------|----------------|-----------|
| 177       | trainlm           | [5, 8, 18]     | 0.024276  | 221       | trainlm           | [5, 17, 19]    | 0.022788  |
| 178       | trainlm           | [5, 8, 19]     | 0.024267  | 222       | trainlm           | [5, 17, 20]    | 0.025473  |
| 179       | trainlm           | [5, 8, 20]     | 0.026215  | 223       | trainlm           | [5, 18, 19]    | 0.029239  |
| 180       | trainlm           | [5, 9, 10]     | 0.023812  | 224       | trainlm           | [6, 7, 9]      | 0.02589   |
| 181       | trainlm           | [5, 9, 13]     | 0.027888  | 225       | trainlm           | [6, 7, 11]     | 0.019419  |
| 182       | trainlm           | [5, 9, 15]     | 0.026313  | 226       | trainlm           | [6, 7, 12]     | 0.025502  |
| 183       | trainlm           | [5, 9, 17]     | 0.020138  | 227       | trainlm           | [6, 7, 13]     | 0.019197  |
| 184       | trainlm           | [5, 9, 19]     | 0.022191  | 228       | trainlm           | [6, 7, 14]     | 0.028957  |
| 185       | trainlm           | [5, 9, 20]     | 0.026173  | 229       | trainlm           | [6, 7, 15]     | 0.02706   |
| 186       | trainlm           | [5, 10, 11]    | 0.028822  | 230       | trainlm           | [6, 7, 16]     | 0.027207  |
| 187       | trainlm           | [5, 10, 13]    | 0.022384  | 231       | trainlm           | [6, 7, 20]     | 0.023248  |
| 188       | trainlm           | [5, 10, 14]    | 0.029394  | 232       | trainlm           | [6, 8, 13]     | 0.027517  |
| 189       | trainlm           | [5, 10, 16]    | 0.027266  | 233       | trainlm           | [6, 8, 14]     | 0.022826  |
| 190       | trainlm           | [5, 10, 17]    | 0.02577   | 234       | trainlm           | [6, 8, 15]     | 0.025366  |
| 191       | trainlm           | [5, 10, 18]    | 0.026393  | 235       | trainlm           | [6, 8, 16]     | 0.028407  |
| 192       | trainlm           | [5, 10, 19]    | 0.025652  | 236       | trainlm           | [6, 8, 17]     | 0.026367  |
| 193       | trainlm           | [5, 10, 20]    | 0.026157  | 237       | trainlm           | [6, 8, 20]     | 0.022482  |
| 194       | trainlm           | [5, 11, 12]    | 0.02386   | 238       | trainlm           | [6, 9, 10]     | 0.020926  |
| 195       | trainlm           | [5, 11, 14]    | 0.022098  | 239       | trainlm           | [6, 9, 11]     | 0.020374  |
| 196       | trainlm           | [5, 11, 15]    | 0.029555  | 240       | trainlm           | [6, 9, 12]     | 0.022418  |
| 197       | trainlm           | [5, 11, 16]    | 0.020461  | 241       | trainlm           | [6, 9, 13]     | 0.021767  |
| 198       | trainlm           | [5, 11, 17]    | 0.020628  | 242       | trainlm           | [6, 9, 14]     | 0.026815  |
| 199       | trainlm           | [5, 11, 19]    | 0.024751  | 243       | trainlm           | [6, 9, 15]     | 0.028121  |
| 200       | trainlm           | [5, 12, 14]    | 0.025937  | 244       | trainlm           | [6, 9, 17]     | 0.022267  |
| 201       | trainlm           | [5, 12, 15]    | 0.01989   | 245       | trainlm           | [6, 9, 18]     | 0.024894  |
| 202       | trainlm           | [5, 12, 18]    | 0.026095  | 246       | trainlm           | [6, 9, 19]     | 0.028824  |
| 203       | trainlm           | [5, 12, 19]    | 0.028442  | 247       | trainlm           | [6, 9, 20]     | 0.021732  |
| 204       | trainlm           | [5, 12, 20]    | 0.020484  | 248       | trainlm           | [6, 10, 11]    | 0.028234  |
| 205       | trainlm           | [5, 13, 16]    | 0.028746  | 249       | trainlm           | [6, 10, 12]    | 0.019828  |
| 206       | trainlm           | [5, 13, 17]    | 0.025889  | 250       | trainlm           | [6, 10, 14]    | 0.025194  |
| 207       | trainlm           | [5, 13, 19]    | 0.025197  | 251       | trainlm           | [6, 10, 17]    | 0.025453  |
| 208       | trainlm           | [5, 14, 15]    | 0.022911  | 252       | trainlm           | [6, 10, 18]    | 0.025026  |
| 209       | trainlm           | [5, 14, 16]    | 0.025035  | 253       | trainlm           | [6, 10, 20]    | 0.020242  |
| 210       | trainlm           | [5, 14, 17]    | 0.023382  | 254       | trainlm           | [6, 11, 12]    | 0.027642  |
| 211       | trainlm           | [5, 14, 18]    | 0.023999  | 255       | trainlm           | [6, 11, 14]    | 0.02275   |
| 212       | trainlm           | [5, 14, 19]    | 0.023317  | 256       | trainlm           | [6, 11, 15]    | 0.024734  |
| 213       | trainlm           | [5, 14, 20]    | 0.027769  | 257       | trainlm           | [6, 11, 16]    | 0.026935  |
| 214       | trainlm           | [5, 15, 16]    | 0.025336  | 258       | trainlm           | [6, 11, 17]    | 0.026464  |
| 215       | trainlm           | [5, 15, 17]    | 0.017589  | 259       | trainlm           | [6, 11, 19]    | 0.025969  |
| 216       | trainlm           | [5, 15, 18]    | 0.029869  | 260       | trainlm           | [6, 12, 13]    | 0.020462  |
| 217       | trainlm           | [5, 15, 19]    | 0.021986  | 261       | trainlm           | [6, 12, 15]    | 0.024411  |
| 218       | trainlm           | [5, 16, 17]    | 0.026385  | 262       | trainlm           | [6, 12, 16]    | 0.020253  |
| 219       | trainlm           | [5, 16, 19]    | 0.025829  | 263       | trainlm           | [6, 12, 17]    | 0.027938  |
| 220       | trainlm           | [5, 16, 20]    | 0.020876  | 264       | trainlm           | [6, 12, 19]    | 0.029521  |

| Model No. | Training Function | Hidden Neurons | Test Loss | Model No. | Training Function | Hidden Neurons | Test Loss |
|-----------|-------------------|----------------|-----------|-----------|-------------------|----------------|-----------|
| 265       | trainlm           | [6, 12, 20]    | 0.01787   | 309       | trainlm           | [7, 11, 14]    | 0.020266  |
| 266       | trainlm           | [6, 13, 14]    | 0.021036  | 310       | trainlm           | [7, 11, 15]    | 0.021781  |
| 267       | trainlm           | [6, 13, 17]    | 0.02246   | 311       | trainlm           | [7, 11, 16]    | 0.022872  |
| 268       | trainlm           | [6, 13, 18]    | 0.020947  | 312       | trainlm           | [7, 11, 17]    | 0.022325  |
| 269       | trainlm           | [6, 13, 19]    | 0.022918  | 313       | trainlm           | [7, 11, 18]    | 0.017691  |
| 270       | trainlm           | [6, 13, 20]    | 0.023887  | 314       | trainlm           | [7, 11, 20]    | 0.024701  |
| 271       | trainlm           | [6, 14, 15]    | 0.016728  | 315       | trainlm           | [7, 12, 13]    | 0.022607  |
| 272       | trainlm           | [6, 14, 17]    | 0.019388  | 316       | trainlm           | [7, 12, 14]    | 0.025172  |
| 273       | trainlm           | [6, 14, 18]    | 0.028385  | 317       | trainlm           | [7, 12, 17]    | 0.021569  |
| 274       | trainlm           | [6, 15, 16]    | 0.029194  | 318       | trainlm           | [7, 12, 18]    | 0.021456  |
| 275       | trainlm           | [6, 15, 17]    | 0.028094  | 319       | trainlm           | [7, 12, 19]    | 0.020822  |
| 276       | trainlm           | [6, 15, 18]    | 0.018153  | 320       | trainlm           | [7, 12, 20]    | 0.027649  |
| 277       | trainlm           | [6, 15, 19]    | 0.017323  | 321       | trainlm           | [7, 13, 15]    | 0.02543   |
| 278       | trainlm           | [6, 16, 18]    | 0.021136  | 322       | trainlm           | [7, 13, 16]    | 0.025565  |
| 279       | trainlm           | [6, 16, 19]    | 0.019058  | 323       | trainlm           | [7, 13, 17]    | 0.021566  |
| 280       | trainlm           | [6, 16, 20]    | 0.027041  | 324       | trainlm           | [7, 13, 19]    | 0.029497  |
| 281       | trainlm           | [6, 17, 18]    | 0.02074   | 325       | trainlm           | [7, 13, 20]    | 0.017737  |
| 282       | trainlm           | [6, 17, 19]    | 0.023886  | 326       | trainlm           | [7, 14, 15]    | 0.029436  |
| 283       | trainlm           | [6, 17, 20]    | 0.024397  | 327       | trainlm           | [7, 14, 17]    | 0.020334  |
| 284       | trainlm           | [6, 19, 20]    | 0.021832  | 328       | trainlm           | [7, 14, 19]    | 0.024916  |
| 285       | trainlm           | [7, 8, 9]      | 0.025043  | 329       | trainlm           | [7, 14, 20]    | 0.024732  |
| 286       | trainlm           | [7, 8, 10]     | 0.02491   | 330       | trainlm           | [7, 15, 16]    | 0.023846  |
| 287       | trainlm           | [7, 8, 11]     | 0.028189  | 331       | trainlm           | [7, 15, 17]    | 0.019015  |
| 288       | trainlm           | [7, 8, 12]     | 0.022613  | 332       | trainlm           | [7, 15, 18]    | 0.028382  |
| 289       | trainlm           | [7, 8, 15]     | 0.02604   | 333       | trainlm           | [7, 15, 19]    | 0.027256  |
| 290       | trainlm           | [7, 8, 16]     | 0.029233  | 334       | trainlm           | [7, 15, 20]    | 0.018687  |
| 291       | trainlm           | [7, 8, 17]     | 0.023669  | 335       | trainlm           | [7, 16, 17]    | 0.020564  |
| 292       | trainlm           | [7, 9, 10]     | 0.025732  | 336       | trainlm           | [7, 16, 18]    | 0.02146   |
| 293       | trainlm           | [7, 9, 14]     | 0.026594  | 337       | trainlm           | [7, 16, 19]    | 0.019281  |
| 294       | trainlm           | [7, 9, 15]     | 0.027803  | 338       | trainlm           | [7, 16, 20]    | 0.025033  |
| 295       | trainlm           | [7, 9, 16]     | 0.018886  | 339       | trainlm           | [7, 17, 18]    | 0.027956  |
| 296       | trainlm           | [7, 9, 18]     | 0.024837  | 340       | trainlm           | [7, 17, 19]    | 0.022673  |
| 297       | trainlm           | [7, 9, 19]     | 0.021873  | 341       | trainlm           | [7, 17, 20]    | 0.022018  |
| 298       | trainlm           | [7, 9, 20]     | 0.020977  | 342       | trainlm           | [7, 18, 19]    | 0.021809  |
| 299       | trainlm           | [7, 10, 11]    | 0.018921  | 343       | trainlm           | [7, 18, 20]    | 0.024642  |
| 300       | trainlm           | [7, 10, 12]    | 0.019845  | 344       | trainlm           | [8, 9, 10]     | 0.020977  |
| 301       | trainlm           | [7, 10, 13]    | 0.029102  | 345       | trainlm           | [8, 9, 13]     | 0.017213  |
| 302       | trainlm           | [7, 10, 14]    | 0.026593  | 346       | trainlm           | [8, 9, 15]     | 0.026605  |
| 303       | trainlm           | [7, 10, 16]    | 0.025991  | 347       | trainlm           | [8, 9, 16]     | 0.029001  |
| 304       | trainlm           | [7, 10, 17]    | 0.025178  | 348       | trainlm           | [8, 9, 17]     | 0.020083  |
| 305       | trainlm           | [7, 10, 18]    | 0.018749  | 349       | trainlm           | [8, 9, 18]     | 0.01756   |
| 306       | trainlm           | [7, 10, 19]    | 0.022861  | 350       | trainlm           | [8, 9, 19]     | 0.016675  |
| 307       | trainlm           | [7, 10, 20]    | 0.021184  | 351       | trainlm           | [8, 10, 11]    | 0.021337  |
| 308       | trainlm           | [7, 11, 13]    | 0.028366  | 352       | trainlm           | [8, 10, 13]    | 0.024706  |

| Model No. | Training Function | Hidden Neurons | Test Loss | Model No. | Training Function | Hidden Neurons | Test Loss |
|-----------|-------------------|----------------|-----------|-----------|-------------------|----------------|-----------|
| 353       | trainlm           | [8, 10, 14]    | 0.022795  | 397       | trainlm           | [9, 10, 13]    | 0.029775  |
| 354       | trainlm           | [8, 10, 15]    | 0.025777  | 398       | trainlm           | [9, 10, 14]    | 0.02176   |
| 355       | trainlm           | [8, 10, 16]    | 0.024821  | 399       | trainlm           | [9, 10, 15]    | 0.018072  |
| 356       | trainlm           | [8, 10, 17]    | 0.025039  | 400       | trainlm           | [9, 10, 16]    | 0.027963  |
| 357       | trainlm           | [8, 10, 18]    | 0.021865  | 401       | trainlm           | [9, 10, 17]    | 0.027865  |
| 358       | trainlm           | [8, 10, 19]    | 0.023573  | 402       | trainlm           | [9, 10, 18]    | 0.020186  |
| 359       | trainlm           | [8, 10, 20]    | 0.02559   | 403       | trainlm           | [9, 10, 19]    | 0.02074   |
| 360       | trainlm           | [8, 11, 12]    | 0.023049  | 404       | trainlm           | [9, 10, 20]    | 0.021299  |
| 361       | trainlm           | [8, 11, 14]    | 0.017586  | 405       | trainlm           | [9, 11, 12]    | 0.029742  |
| 362       | trainlm           | [8, 11, 15]    | 0.023202  | 406       | trainlm           | [9, 11, 13]    | 0.021462  |
| 363       | trainlm           | [8, 11, 16]    | 0.023724  | 407       | trainlm           | [9, 11, 14]    | 0.023381  |
| 364       | trainlm           | [8, 11, 17]    | 0.025552  | 408       | trainlm           | [9, 11, 15]    | 0.020893  |
| 365       | trainlm           | [8, 11, 18]    | 0.02159   | 409       | trainlm           | [9, 11, 16]    | 0.027505  |
| 366       | trainlm           | [8, 11, 19]    | 0.018616  | 410       | trainlm           | [9, 11, 19]    | 0.017625  |
| 367       | trainlm           | [8, 12, 13]    | 0.022627  | 411       | trainlm           | [9, 12, 14]    | 0.029556  |
| 368       | trainlm           | [8, 12, 14]    | 0.022852  | 412       | trainlm           | [9, 12, 15]    | 0.019361  |
| 369       | trainlm           | [8, 12, 16]    | 0.016874  | 413       | trainlm           | [9, 12, 18]    | 0.02014   |
| 370       | trainlm           | [8, 12, 17]    | 0.023433  | 414       | trainlm           | [9, 12, 19]    | 0.016432  |
| 371       | trainlm           | [8, 12, 18]    | 0.026073  | 415       | trainlm           | [9, 12, 20]    | 0.020093  |
| 372       | trainlm           | [8, 12, 20]    | 0.021329  | 416       | trainlm           | [9, 13, 14]    | 0.021387  |
| 373       | trainlm           | [8, 13, 14]    | 0.028235  | 417       | trainlm           | [9, 13, 15]    | 0.024709  |
| 374       | trainlm           | [8, 13, 15]    | 0.020092  | 418       | trainlm           | [9, 13, 16]    | 0.022693  |
| 375       | trainlm           | [8, 13, 16]    | 0.024352  | 419       | trainlm           | [9, 13, 17]    | 0.023471  |
| 376       | trainlm           | [8, 13, 17]    | 0.025584  | 420       | trainlm           | [9, 13, 18]    | 0.018945  |
| 377       | trainlm           | [8, 13, 18]    | 0.027836  | 421       | trainlm           | [9, 13, 19]    | 0.018725  |
| 378       | trainlm           | [8, 13, 19]    | 0.024526  | 422       | trainlm           | [9, 13, 20]    | 0.020318  |
| 379       | trainlm           | [8, 13, 20]    | 0.017419  | 423       | trainlm           | [9, 14, 15]    | 0.025842  |
| 380       | trainlm           | [8, 14, 15]    | 0.023296  | 424       | trainlm           | [9, 14, 16]    | 0.025815  |
| 381       | trainlm           | [8, 14, 16]    | 0.017873  | 425       | trainlm           | [9, 14, 17]    | 0.020473  |
| 382       | trainlm           | [8, 14, 18]    | 0.018982  | 426       | trainlm           | [9, 14, 18]    | 0.020376  |
| 383       | trainlm           | [8, 14, 19]    | 0.027825  | 427       | trainlm           | [9, 14, 20]    | 0.018514  |
| 384       | trainlm           | [8, 14, 20]    | 0.02962   | 428       | trainlm           | [9, 15, 18]    | 0.02099   |
| 385       | trainlm           | [8, 15, 16]    | 0.02393   | 429       | trainlm           | [9, 15, 19]    | 0.025796  |
| 386       | trainlm           | [8, 15, 17]    | 0.023455  | 430       | trainlm           | [9, 16, 17]    | 0.017569  |
| 387       | trainlm           | [8, 15, 18]    | 0.028146  | 431       | trainlm           | [9, 16, 18]    | 0.023721  |
| 388       | trainlm           | [8, 15, 20]    | 0.018414  | 432       | trainlm           | [9, 16, 19]    | 0.015612  |
| 389       | trainlm           | [8, 16, 17]    | 0.017161  | 433       | trainlm           | [9, 16, 20]    | 0.017613  |
| 390       | trainlm           | [8, 16, 18]    | 0.019528  | 434       | trainlm           | [9, 17, 18]    | 0.017676  |
| 391       | trainlm           | [8, 16, 19]    | 0.0189    | 435       | trainlm           | [9, 17, 20]    | 0.025094  |
| 392       | trainlm           | [8, 17, 19]    | 0.020321  | 436       | trainlm           | [9, 18, 19]    | 0.019654  |
| 393       | trainlm           | [8, 18, 19]    | 0.025698  | 437       | trainlm           | [9, 18, 20]    | 0.026639  |
| 394       | trainlm           | [8, 18, 20]    | 0.020604  | 438       | trainlm           | [9, 19, 20]    | 0.021889  |
| 395       | trainlm           | [8, 19, 20]    | 0.016036  | 439       | trainlm           | [10, 11, 12]   | 0.023553  |
| 396       | trainlm           | [9, 10, 12]    | 0.0226    | 440       | trainlm           | [10, 11, 13]   | 0.025543  |

| Model No. | Training Function | Hidden Neurons | Test Loss | Model No. | Training Function | Hidden Neurons | Test Loss |
|-----------|-------------------|----------------|-----------|-----------|-------------------|----------------|-----------|
| 441       | trainlm           | [10, 11, 14]   | 0.029434  | 485       | trainbr           | [5, 11]        | 0.014153  |
| 442       | trainlm           | [10, 11, 15]   | 0.02741   | 486       | trainbr           | [5, 12]        | 0.014792  |
| 443       | trainlm           | [10, 11, 16]   | 0.021277  | 487       | trainbr           | [5, 13]        | 0.014694  |
| 444       | trainlm           | [10, 11, 18]   | 0.019751  | 488       | trainbr           | [5, 14]        | 0.011732  |
| 445       | trainlm           | [10, 11, 19]   | 0.023231  | 489       | trainbr           | [5, 15]        | 0.011909  |
| 446       | trainlm           | [10, 12, 13]   | 0.018263  | 490       | trainbr           | [5, 16]        | 0.014226  |
| 447       | trainlm           | [10, 12, 14]   | 0.019684  | 491       | trainbr           | [5, 18]        | 0.011923  |
| 448       | trainlm           | [10, 12, 15]   | 0.017852  | 492       | trainbr           | [5, 19]        | 0.012937  |
| 449       | trainlm           | [10, 12, 17]   | 0.019541  | 493       | trainbr           | [5, 20]        | 0.010302  |
| 450       | trainlm           | [10, 12, 18]   | 0.019565  | 494       | trainbr           | [6, 7]         | 0.012969  |
| 451       | trainlm           | [10, 12, 19]   | 0.022747  | 495       | trainbr           | [6, 8]         | 0.012761  |
| 452       | trainlm           | [10, 12, 20]   | 0.026328  | 496       | trainbr           | [6, 9]         | 0.013041  |
| 453       | trainlm           | [10, 13, 14]   | 0.02943   | 497       | trainbr           | [6, 11]        | 0.017278  |
| 454       | trainlm           | [10, 13, 15]   | 0.018051  | 498       | trainbr           | [6, 12]        | 0.010242  |
| 455       | trainlm           | [10, 13, 16]   | 0.024386  | 499       | trainbr           | [6, 14]        | 0.01513   |
| 456       | trainlm           | [10, 13, 18]   | 0.029167  | 500       | trainbr           | [6, 15]        | 0.012497  |
| 457       | trainlm           | [10, 13, 19]   | 0.022914  | 501       | trainbr           | [6, 16]        | 0.009478  |
| 458       | trainlm           | [10, 13, 20]   | 0.025944  | 502       | trainbr           | [6, 17]        | 0.016224  |
| 459       | trainlm           | [10, 14, 15]   | 0.021652  | 503       | trainbr           | [6, 18]        | 0.011696  |
| 460       | trainlm           | [10, 14, 16]   | 0.022042  | 504       | trainbr           | [6, 19]        | 0.012246  |
| 461       | trainlm           | [10, 14, 17]   | 0.020876  | 505       | trainbr           | [6, 20]        | 0.010943  |
| 462       | trainlm           | [10, 14, 18]   | 0.028207  | 506       | trainbr           | [7, 8]         | 0.008514  |
| 463       | trainlm           | [10, 14, 19]   | 0.027713  | 507       | trainbr           | [7, 9]         | 0.01053   |
| 464       | trainlm           | [10, 14, 20]   | 0.021265  | 508       | trainbr           | [7, 10]        | 0.008429  |
| 465       | trainlm           | [10, 15, 17]   | 0.017749  | 509       | trainbr           | [7, 11]        | 0.009379  |
| 466       | trainbr           | [5]            | 0.014153  | 510       | trainbr           | [7, 12]        | 0.01313   |
| 467       | trainbr           | [6]            | 0.015141  | 511       | trainbr           | [7, 13]        | 0.009743  |
| 468       | trainbr           | [3, 5]         | 0.014524  | 512       | trainbr           | [7, 14]        | 0.014942  |
| 469       | trainbr           | [3, 20]        | 0.019732  | 513       | trainbr           | [7, 15]        | 0.010079  |
| 470       | trainbr           | [4, 5]         | 0.01199   | 514       | trainbr           | [7, 16]        | 0.011815  |
| 471       | trainbr           | [4, 8]         | 0.013834  | 515       | trainbr           | [7, 17]        | 0.012273  |
| 472       | trainbr           | [4, 10]        | 0.018487  | 516       | trainbr           | [7, 18]        | 0.012879  |
| 473       | trainbr           | [4, 11]        | 0.018422  | 517       | trainbr           | [7, 19]        | 0.011921  |
| 474       | trainbr           | [4, 12]        | 0.015798  | 518       | trainbr           | [7, 20]        | 0.013182  |
| 475       | trainbr           | [4, 13]        | 0.014719  | 519       | trainbr           | [8, 9]         | 0.010463  |
| 476       | trainbr           | [4, 14]        | 0.015584  | 520       | trainbr           | [8, 10]        | 0.016625  |
| 477       | trainbr           | [4, 15]        | 0.013352  | 521       | trainbr           | [8, 11]        | 0.011596  |
| 478       | trainbr           | [4, 16]        | 0.015353  | 522       | trainbr           | [8, 12]        | 0.011678  |
| 479       | trainbr           | [4, 17]        | 0.01194   | 523       | trainbr           | [8, 13]        | 0.011296  |
| 480       | trainbr           | [4, 20]        | 0.014313  | 524       | trainbr           | [8, 14]        | 0.010791  |
| 481       | trainbr           | [5, 6]         | 0.011728  | 525       | trainbr           | [8, 15]        | 0.015623  |
| 482       | trainbr           | [5, 7]         | 0.012902  | 526       | trainbr           | [8, 16]        | 0.00825   |
| 483       | trainbr           | [5, 8]         | 0.012653  | 527       | trainbr           | [8, 17]        | 0.011503  |
| 484       | trainbr           | [5, 10]        | 0.011425  | 528       | trainbr           | [8, 18]        | 0.012841  |

| Model No. | Training Function | Hidden Neurons | Test Loss | Model No. | Training Function | Hidden Neurons | Test Loss |
|-----------|-------------------|----------------|-----------|-----------|-------------------|----------------|-----------|
| 529       | trainbr           | [8, 19]        | 0.008527  | 573       | trainbr           | [13, 18]       | 0.014217  |
| 530       | trainbr           | [8, 20]        | 0.011129  | 574       | trainbr           | [13, 19]       | 0.010559  |
| 531       | trainbr           | [9, 10]        | 0.011004  | 575       | trainbr           | [13, 20]       | 0.012732  |
| 532       | trainbr           | [9, 11]        | 0.016558  | 576       | trainbr           | [14, 15]       | 0.010466  |
| 533       | trainbr           | [9, 12]        | 0.017143  | 577       | trainbr           | [14, 17]       | 0.010628  |
| 534       | trainbr           | [9, 13]        | 0.011186  | 578       | trainbr           | [14, 18]       | 0.018114  |
| 535       | trainbr           | [9, 14]        | 0.010405  | 579       | trainbr           | [14, 19]       | 0.008564  |
| 536       | trainbr           | [9, 15]        | 0.013585  | 580       | trainbr           | [14, 20]       | 0.015524  |
| 537       | trainbr           | [9, 16]        | 0.010382  | 581       | trainbr           | [15, 16]       | 0.009957  |
| 538       | trainbr           | [9, 17]        | 0.011499  | 582       | trainbr           | [15, 17]       | 0.009106  |
| 539       | trainbr           | [9, 18]        | 0.009907  | 583       | trainbr           | [15, 18]       | 0.012153  |
| 540       | trainbr           | [9, 19]        | 0.011854  | 584       | trainbr           | [15, 19]       | 0.011849  |
| 541       | trainbr           | [9, 20]        | 0.011469  | 585       | trainbr           | [15, 20]       | 0.011703  |
| 542       | trainbr           | [10, 11]       | 0.009864  | 586       | trainbr           | [16, 17]       | 0.011123  |
| 543       | trainbr           | [10, 12]       | 0.013366  | 587       | trainbr           | [16, 18]       | 0.010621  |
| 544       | trainbr           | [10, 13]       | 0.013657  | 588       | trainbr           | [16, 19]       | 0.011178  |
| 545       | trainbr           | [10, 14]       | 0.013183  | 589       | trainbr           | [16, 20]       | 0.010883  |
| 546       | trainbr           | [10, 15]       | 0.012048  | 590       | trainbr           | [17, 18]       | 0.007922  |
| 547       | trainbr           | [10, 16]       | 0.011199  | 591       | trainbr           | [17, 19]       | 0.011424  |
| 548       | trainbr           | [10, 17]       | 0.013794  | 592       | trainbr           | [17, 20]       | 0.011471  |
| 549       | trainbr           | [10, 18]       | 0.014148  | 593       | trainbr           | [18, 19]       | 0.01041   |
| 550       | trainbr           | [10, 19]       | 0.013545  | 594       | trainbr           | [18, 20]       | 0.010753  |
| 551       | trainbr           | [10, 20]       | 0.009219  | 595       | trainbr           | [19, 20]       | 0.011261  |
| 552       | trainbr           | [11, 12]       | 0.013531  |           |                   |                |           |
| 553       | trainbr           | [11, 13]       | 0.010876  |           |                   |                |           |
| 554       | trainbr           | [11, 14]       | 0.014877  |           |                   |                |           |
| 555       | trainbr           | [11, 15]       | 0.009262  |           |                   |                |           |
| 556       | trainbr           | [11, 16]       | 0.012353  |           |                   |                |           |
| 557       | trainbr           | [11, 17]       | 0.015619  |           |                   |                |           |
| 558       | trainbr           | [11, 18]       | 0.014471  |           |                   |                |           |
| 559       | trainbr           | [11, 19]       | 0.008801  |           |                   |                |           |
| 560       | trainbr           | [11, 20]       | 0.00969   |           |                   |                |           |
| 561       | trainbr           | [12, 13]       | 0.012397  |           |                   |                |           |
| 562       | trainbr           | [12, 14]       | 0.012743  |           |                   |                |           |
| 563       | trainbr           | [12, 15]       | 0.01034   |           |                   |                |           |
| 564       | trainbr           | [12, 16]       | 0.009265  |           |                   |                |           |
| 565       | trainbr           | [12, 17]       | 0.016304  |           |                   |                |           |
| 566       | trainbr           | [12, 18]       | 0.013469  |           |                   |                |           |
| 567       | trainbr           | [12, 19]       | 0.010983  |           |                   |                |           |
| 568       | trainbr           | [12, 20]       | 0.008335  |           |                   |                |           |
| 569       | trainbr           | [13, 14]       | 0.011     |           |                   |                |           |
| 570       | trainbr           | [13, 15]       | 0.011316  |           |                   |                |           |
| 571       | trainbr           | [13, 16]       | 0.009451  |           |                   |                |           |
| 572       | trainbr           | [13, 17]       | 0.008701  |           |                   |                |           |

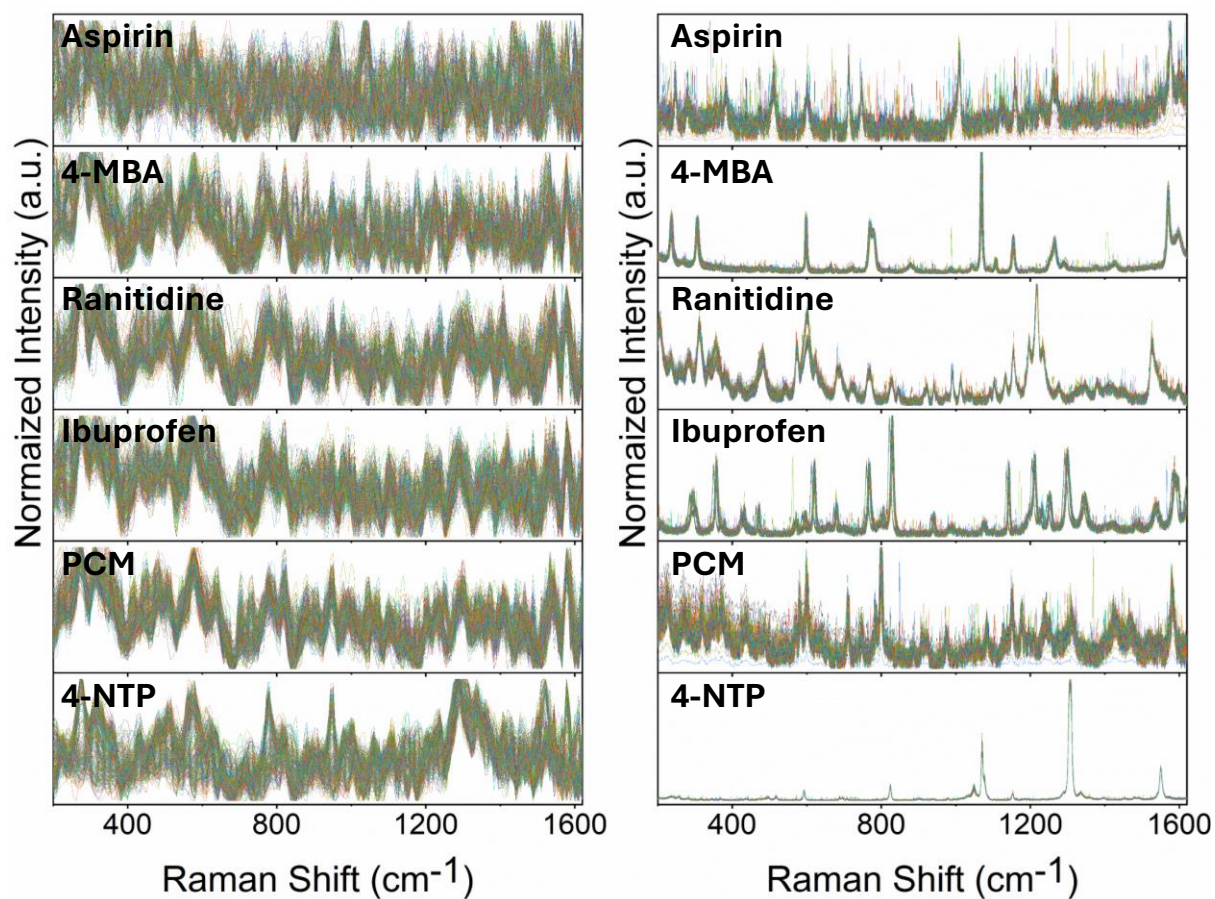

**Figure S1:** The low-resolution (left) and high-resolution (right) 400 Raman spectra each of different samples taken in solid form using a 785 nm laser source.

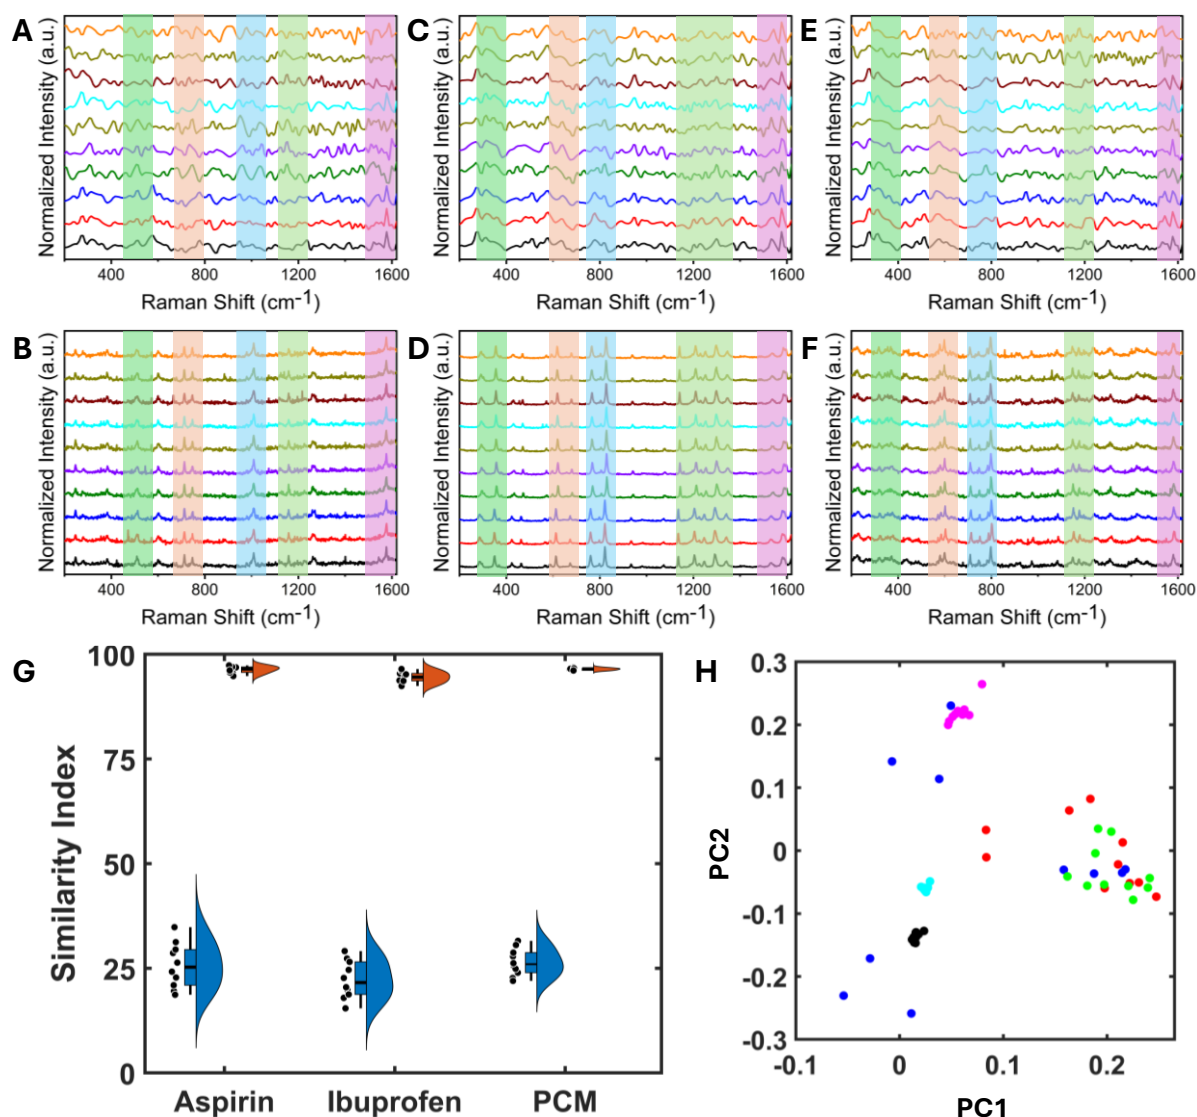

**Figure S2:** The additional low-resolution Raman spectra (10 spectra from each sample class) (A) Aspirin, (C) Ibuprofen, and (E) PCM, where the highlighted part in the low-resolution spectra shows the spectral differences (similarity index of 23.96%, 21.01%, and 23.80%, respectively) within the same sample under identical conditions. This additional low-resolution Raman spectra (A, C, and E) was fed to the trained GAN model to get the high-resolution instance. The highlighted part shows that instead of the spectral differences in low-resolution profile, the model capable to rebuild these lost features and generate the high-resolution counterpart (B) Aspirin, (D) Ibuprofen, and (F) PCM (similarity index of 96.70%, 94.31%, and 96.30%, respectively). (G) The violin plot shows the variation of similarity index in the additional low-resolution and GAN-generated high resolution Raman spectra shows less than 25% similarity between low-resolution profile while the GAN-generated instances show more than 90% similarity index. (H) The scatter plot from the PCA scores shows the highly random fluctuation (more spread in data points) in the low-resolution profile and minimum in the GAN-generated high-resolution Raman spectra.

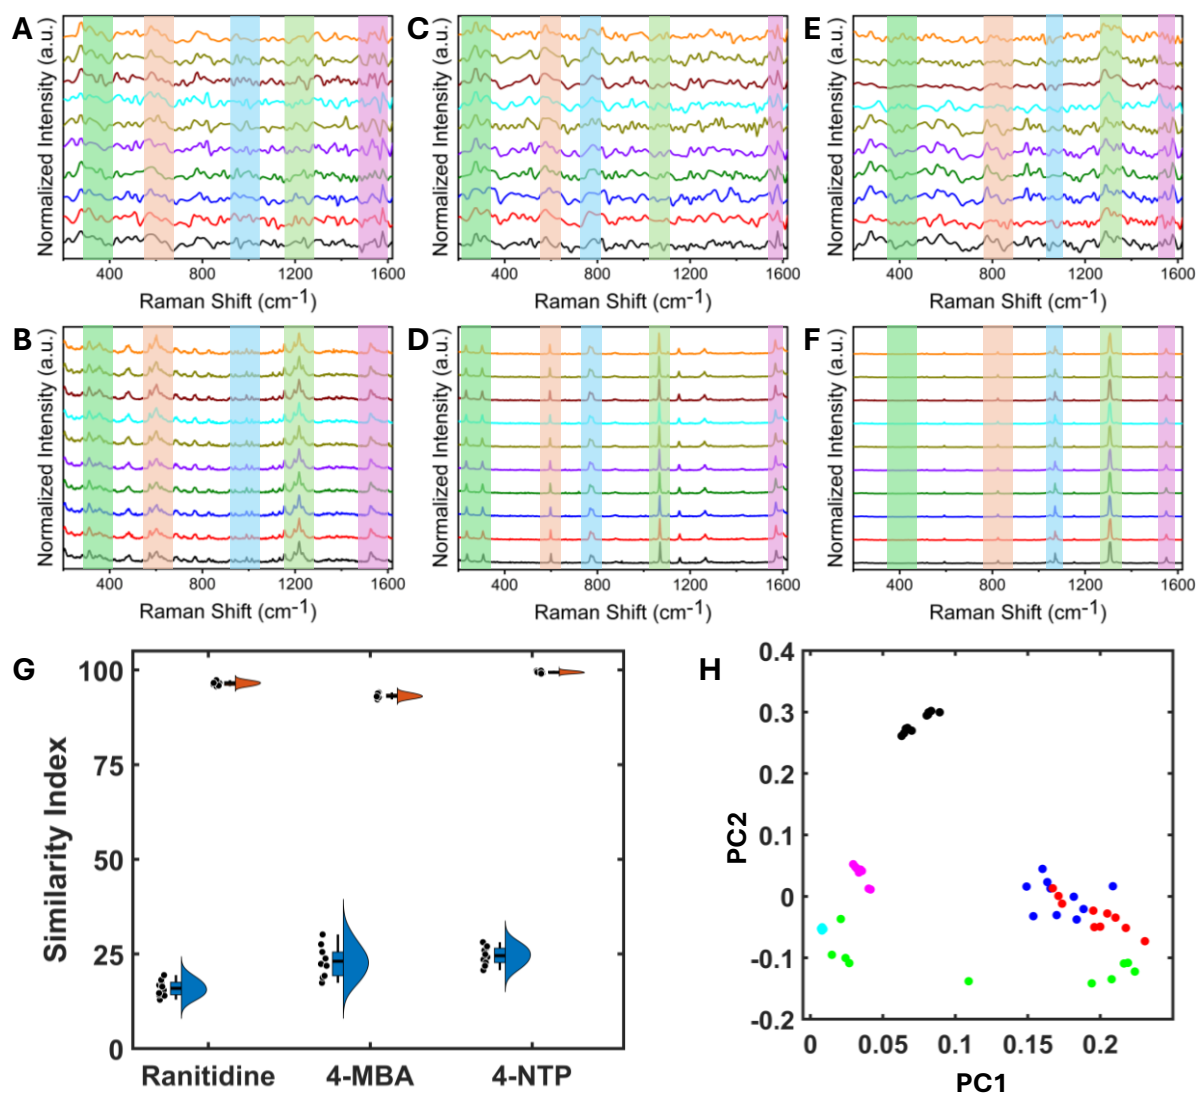

**Figure S3:** The additional low-resolution Raman spectra (10 spectra from each sample class) (A) Ranitidine, (C) 4-MBA, and (E) 4-NTP, where the highlighted part in the low-resolution spectra shows the spectral differences (similarity index of 15.39%, 22.21%, and 24.05%, respectively) within the same sample under identical conditions. This additional low-resolution Raman spectra (A, C, and E) was fed to the trained GAN model to get the high-resolution instance. The highlighted part shows that instead of the spectral differences in low-resolution profile, the model capable to rebuild these lost features and generate the high-resolution counterpart (B) Ranitidine, (D) 4-MBA, and (F) 4-NTP (similarity index of 96.45%, 93.13%, and 99.57%, respectively). (G) The violin plot shows the variation of similarity index in the additional low-resolution and GAN-generated high resolution Raman spectra shows less than 25% similarity between low-resolution profile while the GAN-generated instances show more than 90% similarity index. (H) The scatter plot from the PCA scores shows the highly random fluctuation (more spread in data points) in the low-resolution profile and minimum in the GAN-generated high-resolution Raman spectra.

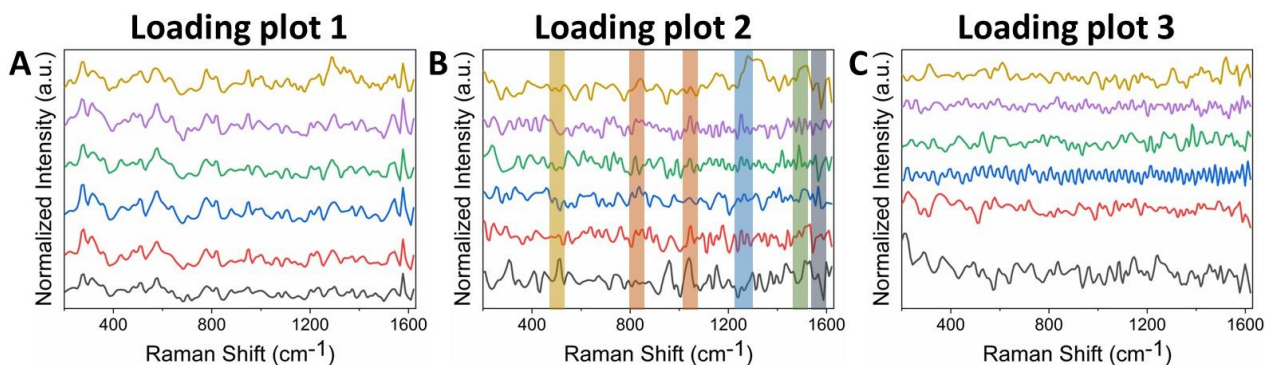

**Figure S4:** PCA loadings were utilized to observe the differences between the visually similar-looking spectra from the different sample classes. The Raman spectral features appeared visually identical in Loading Plot 1, but there is a major difference between the Raman features of the different sample classes as shown in Loading Plot 2. These differences, which are not visually apparent in the original low-resolution spectra, can be detected through PCA. This shows that the visually similar spectra have hidden features embedded in the noise, which can be identified by the GAN. That is why it is able to identify the sample classes without labels and generate their high-resolution spectra. Aspirin (black), ibuprofen (red), PCM (blue), ranitidine (green), 4-MBA (magenta), and 4-NTP (yellow).

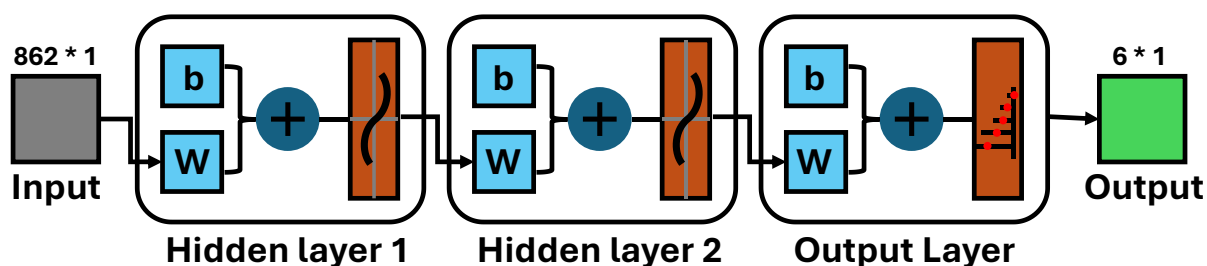

**Figure S5:** The architecture of the ANN classification network having highest accuracy and minimum test loss (model 1) is consists of one input layer, two hidden layers with 17 and 18 neurons respectively, followed by the classification layer in the end.

**Table S3:** The best three ANN classification network with their optimized parameters and performance during training and testing with additional GAN-generated high-resolution dataset.

| Name    | Training Function | No. of hidden layers/No. of Neurons | Accuracy (Training, Testing, and Validation) | Accuracy (Additional dataset, GAN-generated) | Loss (Additional dataset, GAN-generated) |
|---------|-------------------|-------------------------------------|----------------------------------------------|----------------------------------------------|------------------------------------------|
| Model 1 | trainbr           | [17, 18]                            | 100 %                                        | 97.5 %                                       | 0.007922                                 |
| Model 2 | trainbr           | [8, 16]                             | 100 %                                        | 97.4 %                                       | 0.008250                                 |
| Model 3 | trainbr           | [12, 20]                            | 100 %                                        | 97.3 %                                       | 0.008335                                 |

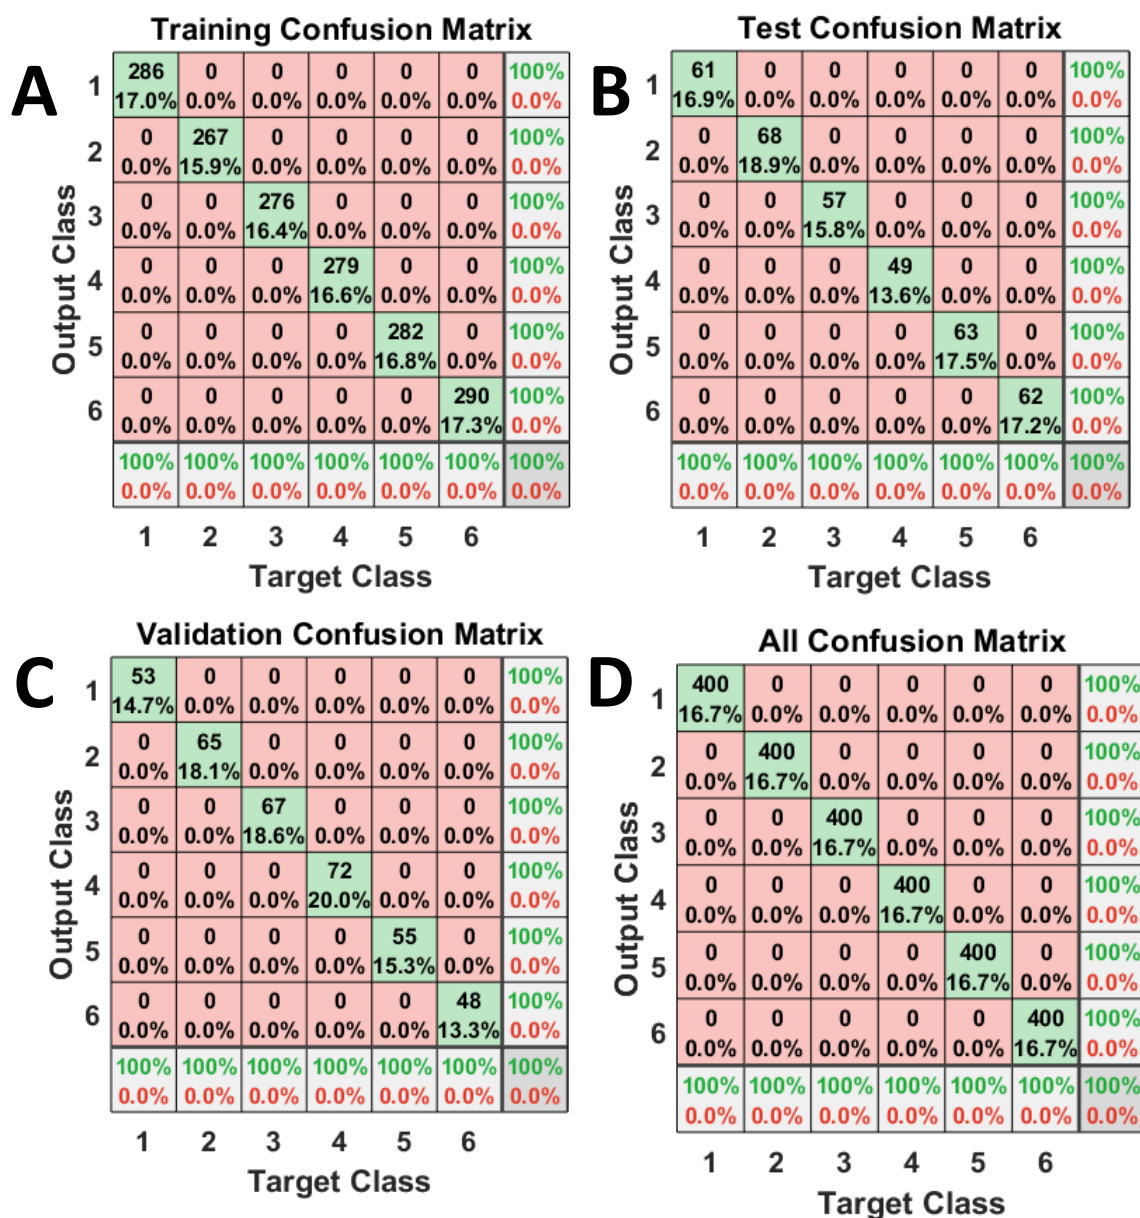

**Figure S6:** Confusion matrices showing the accuracy of the ANN classification network (model1) on high-resolution Raman dataset for (A) training, (B) testing, (C) validation, and (D) overall accuracy. The representation for different samples is as follows: (1) aspirin, (2) ibuprofen, (3) PCM, (4) ranitidine, (5) 4-MBA, and (6) 4-NTP. The confusion matrix shows the target class (actual) vs output class (predicted by the model). The similar kind of accuracy was observed for both model 2 and model 3.

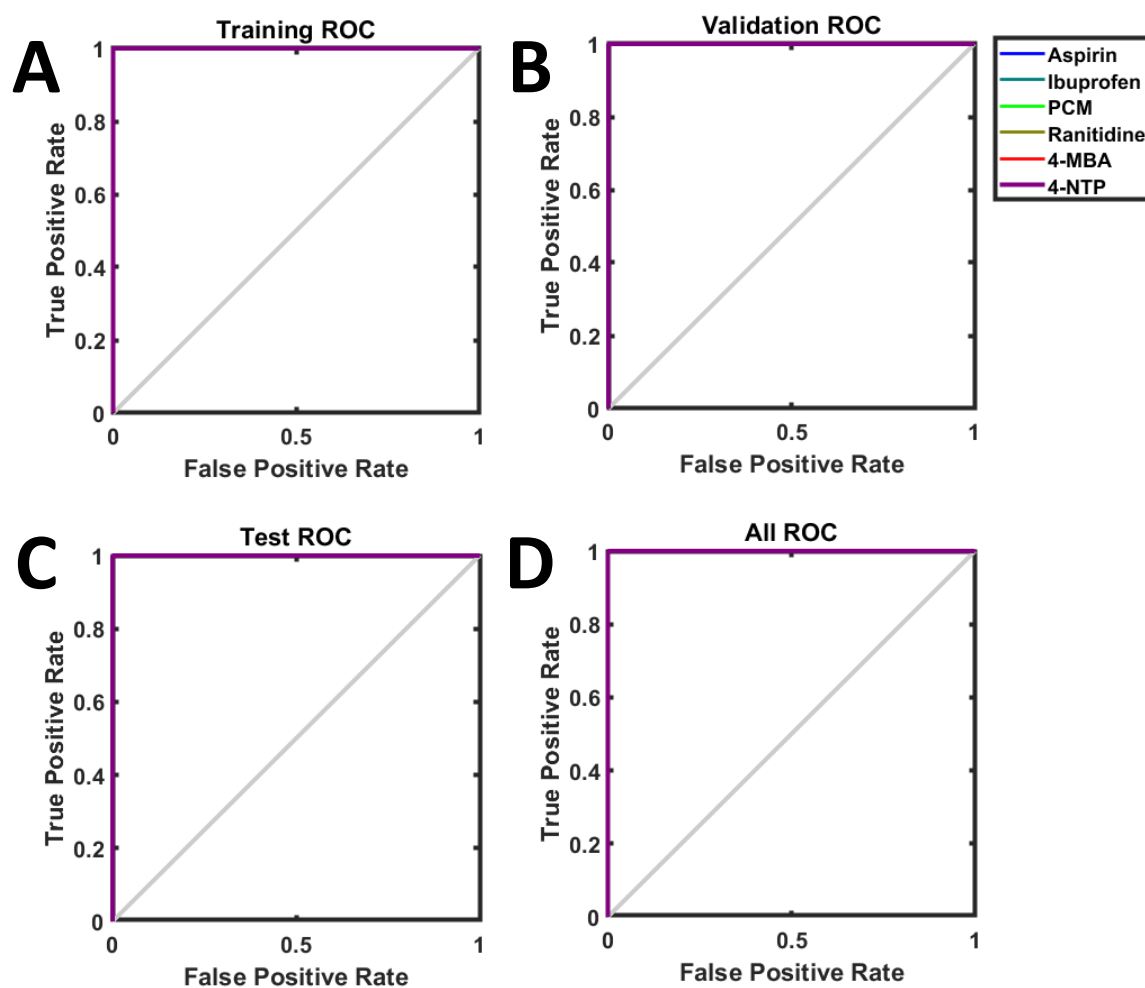

**Figure S7:** ROC of the ANN classification network (model1) on high-resolution Raman dataset for (A) training, (B) validation, (C) testing, and (D) overall. The closer the curve is to the one, the more accurate the results will be for classification. The similar kind of trend was observed for both model 2 and model 3.

|              |   |               |               |               |               |               |               |               |
|--------------|---|---------------|---------------|---------------|---------------|---------------|---------------|---------------|
| Output Class | 1 | 393<br>16.4%  | 1<br>0.0%     | 0<br>0.0%     | 2<br>0.1%     | 2<br>0.1%     | 0<br>0.0%     | 98.7%<br>1.3% |
|              | 2 | 0<br>0.0%     | 388<br>16.2%  | 0<br>0.0%     | 2<br>0.1%     | 3<br>0.1%     | 0<br>0.0%     | 98.7%<br>1.3% |
|              | 3 | 0<br>0.0%     | 2<br>0.1%     | 389<br>16.2%  | 1<br>0.0%     | 7<br>0.3%     | 0<br>0.0%     | 97.5%<br>2.5% |
|              | 4 | 0<br>0.0%     | 2<br>0.1%     | 1<br>0.0%     | 384<br>16.0%  | 2<br>0.1%     | 0<br>0.0%     | 98.7%<br>1.3% |
|              | 5 | 7<br>0.3%     | 7<br>0.3%     | 10<br>0.4%    | 11<br>0.5%    | 386<br>16.1%  | 1<br>0.0%     | 91.5%<br>8.5% |
|              | 6 | 0<br>0.0%     | 0<br>0.0%     | 0<br>0.0%     | 0<br>0.0%     | 0<br>0.0%     | 399<br>16.6%  | 100%<br>0.0%  |
|              |   | 98.2%<br>1.7% | 97.0%<br>3.0% | 97.2%<br>2.7% | 96.0%<br>4.0% | 96.5%<br>3.5% | 99.8%<br>0.2% | 97.5%<br>2.5% |
|              |   | 1             | 2             | 3             | 4             | 5             | 6             |               |
| Target Class |   |               |               |               |               |               |               |               |

**Figure S8:** Confusion matrices showing the accuracy of the ANN classification network (model 1) for the additional dataset, i.e., GAN-generated high-resolution Raman data with a classification accuracy of 97.5%. The representation for different samples is as follows: (1) aspirin, (2) ibuprofen, (3) PCM, (4) ranitidine, (5) 4-MBA, and (6) 4-NTP.

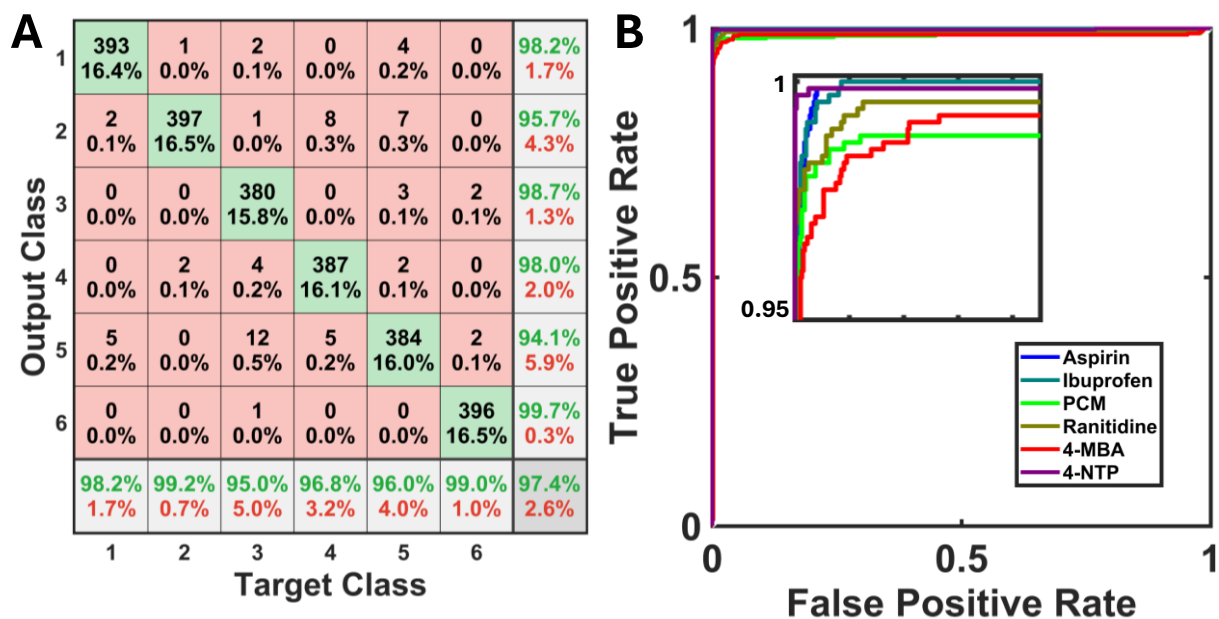

**Figure S9:** (A) Confusion matrices showing the accuracy of the ANN classification network (model 2) for the additional dataset, i.e., GAN-generated high-resolution Raman data with a classification accuracy of 97.4%. (B) ROC of the ANN classification network (model 2) for GAN-generated high-resolution Raman data. The closer the curve is to the one, the more accurate the results will be for classification. The representation for different samples is as follows: (1) aspirin, (2) ibuprofen, (3) PCM, (4) ranitidine, (5) 4-MBA, and (6) 4-NTP.

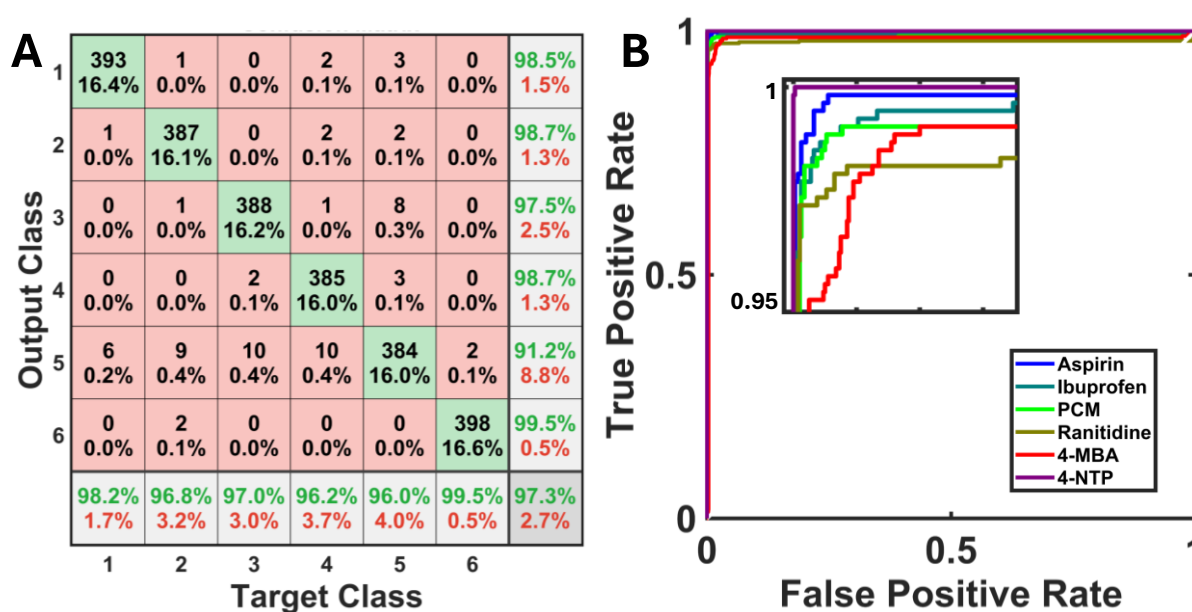

**Figure S10:** (A) Confusion matrices showing the accuracy of the ANN classification network (model 3) for the additional dataset, i.e., GAN-generated high-resolution Raman data with a classification accuracy of 97.3%. (B) ROC of the ANN classification network (model 3) for GAN-generated high-resolution Raman data. The closer the curve is to the one, the more accurate the results will be for classification. The representation for different samples is as follows: (1) aspirin, (2) ibuprofen, (3) PCM, (4) ranitidine, (5) 4-MBA, and (6) 4-NTP.

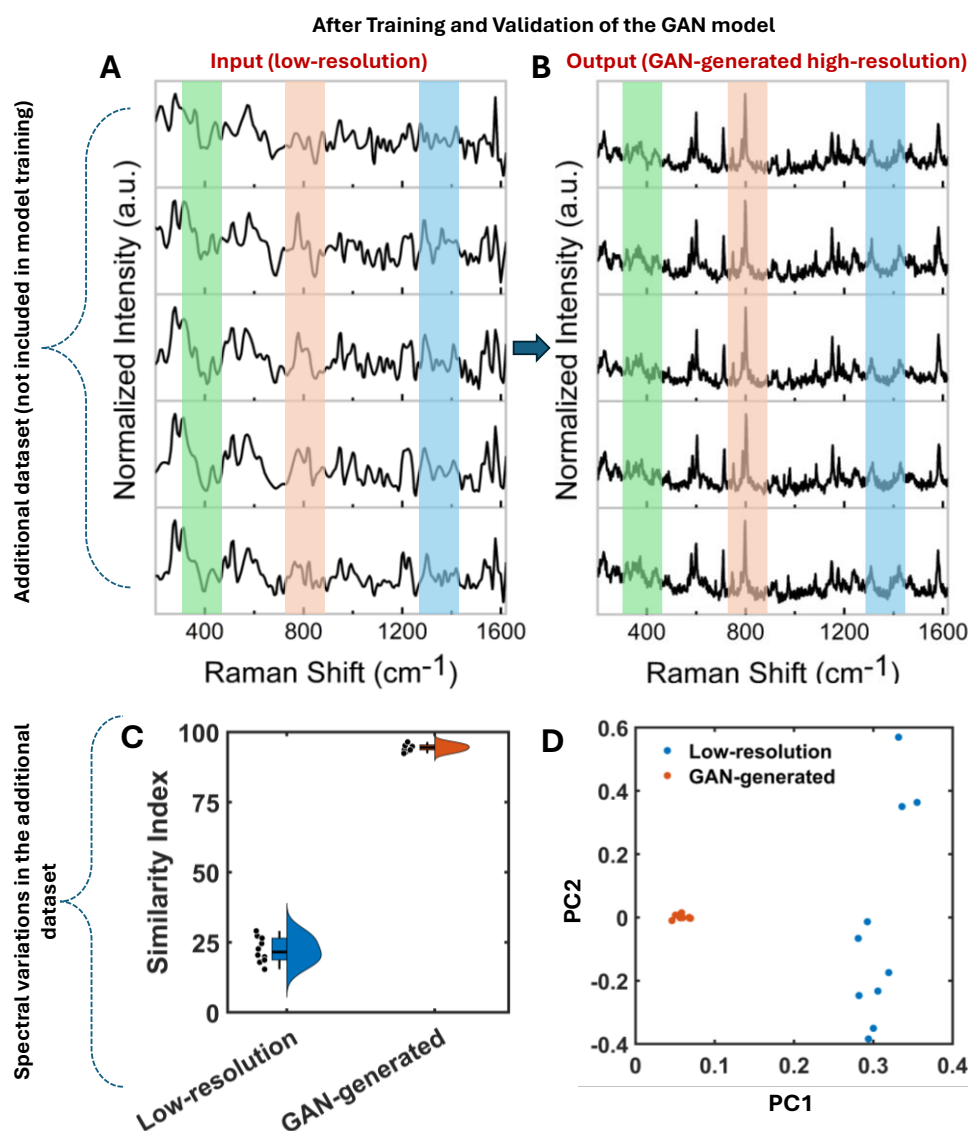

**Figure S11:** The GAN model was trained, validated, and tested using the 2400 low-resolution Raman spectra from 6 different class of samples (random splitting of dataset). The trained model for further tested on the additional low-resolution dataset (never fed to model) to check for the model accuracy to transform the low-resolution instance to a high-resolution Raman spectrum. The trained GAN model transformed the low-resolution to high resolution in completely unsupervised way. (A) The low-resolution Raman spectra of the ibuprofen drug, where the highlighted part in the low-resolution spectra shows the spectral differences (similarity index of 21% only) within the same sample under identical conditions. (B) This low-resolution Raman spectra (A) was fed to the trained GAN model to get the high-resolution instance. The highlighted part shows that instead of the spectra differences in low-resolution profile, the model capable to rebuild these lost features and generate the high-resolution counterpart (similarity index of 94%). (C) The violin plot shows the variation of similarity index in the additional low-resolution (10 more samples) with similarity index of around 21% and GAN-generated high resolution Raman spectra with similarity index of 94%. (D) The scatter plot from the PCA scores shows the highly random fluctuation (more spread in data points) in the low-resolution profile and minimum in the GAN-generated high-resolution Raman spectra.

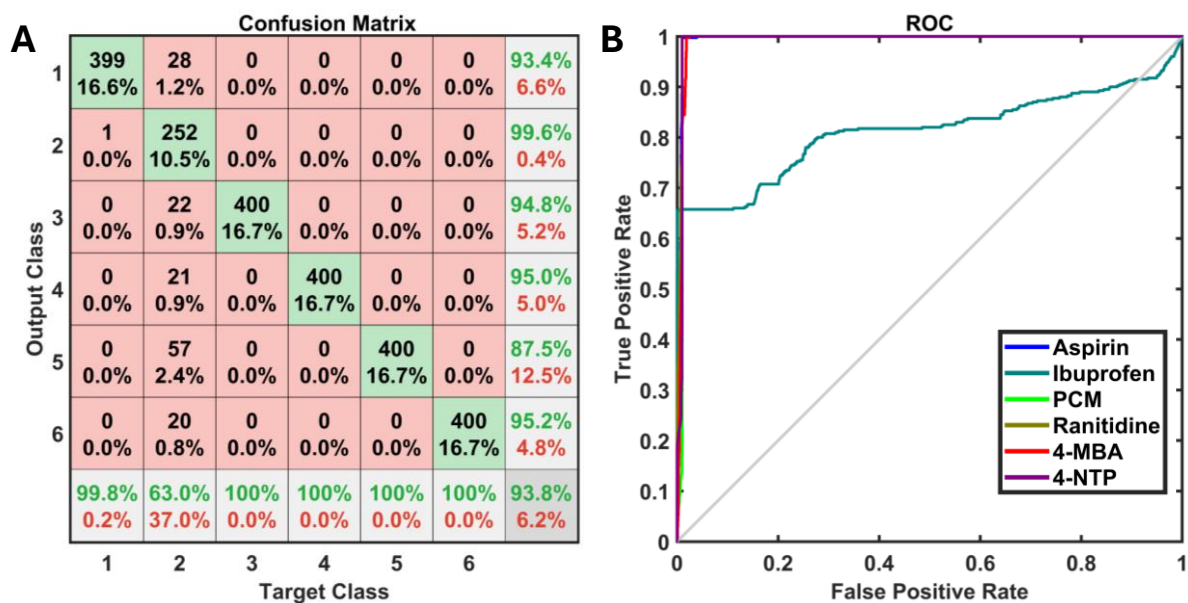

**Figure S12:** (A) Confusion matrices showing the accuracy of the ANN classification network for GAN-generated high-resolution Raman dataset in case of sample-out (ibuprofen sample is not a part of the training set during GAN model training) with a classification accuracy of 93.8%. (B) ROC of the ANN classification network for GAN-generated high-resolution Raman data. The closer the curve is to the one, the more accurate the results will be for classification. The representation for different samples is as follows: (1) aspirin, (2) ibuprofen, (3) PCM, (4) ranitidine, (5) 4-MBA, and (6) 4-NTP.

**Table S4:** SNR of Raman spectra accumulated using high-resolution (HR), low-resolution (LR), and machine learning (ML) generated for different samples.

| <b>Name</b>   | <b>No. of Samples</b> | <b>Mean</b> | <b>Standard Deviation</b> | <b>Median</b> | <b>Minimum</b> | <b>Maximum</b> |
|---------------|-----------------------|-------------|---------------------------|---------------|----------------|----------------|
| Aspirin HR    | 400                   | 23.581      | 8.795                     | 23.090        | 12.610         | 180.808        |
| Aspirin LR    | 400                   | 7.995       | 3.292                     | 7.616         | 3.946          | 57.172         |
| Aspirin ML    | 400                   | 45.641      | 9.079                     | 44.747        | 33.647         | 162.210        |
| Ibuprofen HR  | 400                   | 33.213      | 10.274                    | 31.840        | 10.139         | 177.383        |
| Ibuprofen LR  | 400                   | 10.159      | 6.660                     | 8.202         | 3.800          | 59.728         |
| Ibuprofen ML  | 400                   | 37.403      | 4.805                     | 37.172        | 10.501         | 55.476         |
| PCM HR        | 400                   | 106.312     | 11.583                    | 106.825       | 20.517         | 129.524        |
| PCM LR        | 400                   | 9.469       | 2.241                     | 9.140         | 4.899          | 23.589         |
| PCM ML        | 400                   | 172.409     | 14.652                    | 184.890       | 27.765         | 314.103        |
| Ranitidine HR | 400                   | 61.021      | 11.661                    | 60.635        | 22.270         | 104.754        |
| Ranitidine LR | 400                   | 15.964      | 9.972                     | 13.597        | 5.406          | 115.825        |
| Ranitidine ML | 400                   | 118.224     | 17.320                    | 117.960       | 41.314         | 187.577        |
| 4-MBA HR      | 400                   | 83.942      | 12.214                    | 84.013        | 38.648         | 126.680        |
| 4-MBA LR      | 400                   | 14.466      | 5.201                     | 13.521        | 6.171          | 39.749         |
| 4-MBA ML      | 400                   | 133.958     | 15.229                    | 143.864       | 21.522         | 232.148        |
| 4-NTP HR      | 400                   | 85.252      | 18.124                    | 34101.064     | 33.839         | 81.849         |
| 4-NTP LR      | 400                   | 8.580       | 5.704                     | 5.463         | 3.572          | 37.482         |
| 4-NTP ML      | 400                   | 128.547     | 14.136                    | 51419.117     | 4.889          | 13.985         |

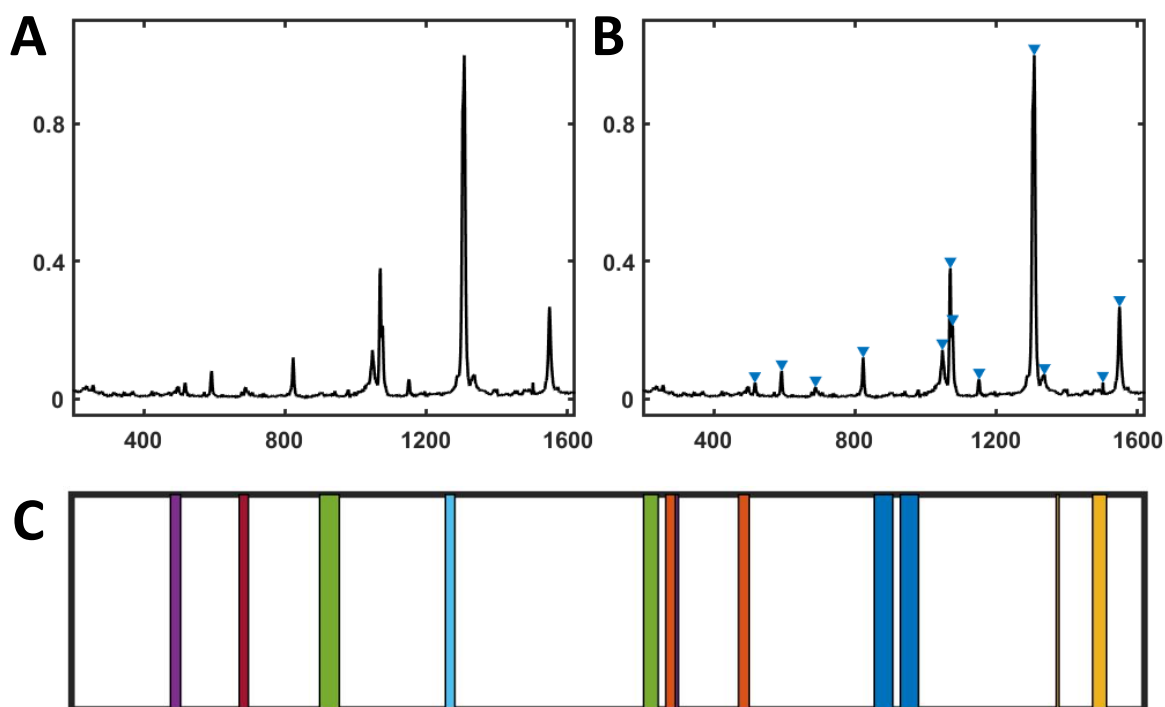

**Figure S13:** The process of making a Raman barcode. (A) the Raman spectra of the 4-NTP molecule. (B) using the findpeaks function to extract the peak location and FWHM and incorporate that information in the barcode. (C) The Raman barcode of the 4-NTP molecule.

**Table S5:** Average similarity index (%) of the low-resolution Raman barcode with the high-resolution Raman barcode.

| Low<br>High | Aspirin       | Ibuprofen     | PCM           | Ranitidine    | 4-MBA         | 4-NTP         |
|-------------|---------------|---------------|---------------|---------------|---------------|---------------|
| Aspirin     | <b>17.253</b> | 20.468        | 18.523        | 14.258        | 16.425        | 18.097        |
| Ibuprofen   | 16.811        | <b>20.045</b> | 18.144        | 12.733        | 14.987        | 16.933        |
| PCM         | 18.052        | 20.481        | <b>17.278</b> | 14.023        | 15.810        | 17.511        |
| Ranitidine  | 14.735        | 16.694        | 18.386        | <b>15.277</b> | 14.274        | 15.309        |
| 4-MBA       | 16.187        | 19.520        | 18.003        | 13.757        | <b>13.717</b> | 14.850        |
| 4-NTP       | 18.629        | 20.657        | 19.738        | 15.556        | 16.142        | <b>18.462</b> |

**Table S6:** Standard deviation of similarity index of the low-resolution Raman barcode with the high-resolution Raman barcode.

| Low<br>High | Aspirin      | Ibuprofen    | PCM          | Ranitidine   | 4-MBA        | 4-NTP        |
|-------------|--------------|--------------|--------------|--------------|--------------|--------------|
| Aspirin     | <b>7.027</b> | 7.080        | 7.954        | 7.204        | 7.550        | 7.497        |
| Ibuprofen   | 6.967        | <b>7.740</b> | 9.024        | 6.236        | 7.181        | 7.046        |
| PCM         | 8.804        | 8.537        | <b>7.889</b> | 6.852        | 7.572        | 7.727        |
| Ranitidine  | 6.474        | 7.666        | 8.095        | <b>6.977</b> | 7.076        | 7.139        |
| 4-MBA       | 8.592        | 9.021        | 9.035        | 7.214        | <b>6.820</b> | 7.744        |
| 4-NTP       | 8.131        | 8.491        | 8.798        | 7.615        | 7.923        | <b>8.163</b> |

**Table S7:** Average similarity index (%) of the GAN-generated high-resolution Raman barcode with the high-resolution Raman barcode.

| GAN<br>High | Aspirin       | Ibuprofen     | PCM           | Ranitidine    | 4-MBA         | 4-NTP         |
|-------------|---------------|---------------|---------------|---------------|---------------|---------------|
| Aspirin     | <b>97.643</b> | 43.901        | 24.709        | 24.704        | 25.304        | 18.674        |
| Ibuprofen   | 42.500        | <b>95.250</b> | 31.345        | 46.600        | 45.705        | 25.877        |
| PCM         | 24.247        | 32.369        | <b>97.344</b> | 63.380        | 21.222        | 10.673        |
| Ranitidine  | 33.932        | 48.212        | 64.693        | <b>96.442</b> | 44.400        | 60.332        |
| 4-MBA       | 26.253        | 44.157        | 22.200        | 40.674        | <b>98.803</b> | 50.456        |
| 4-NTP       | 18.518        | 26.869        | 11.376        | 12.235        | 45.305        | <b>99.685</b> |

**Table S8:** Standard deviation of similarity index of the GAN-generated high-resolution Raman barcode with the high-resolution Raman barcode.

| GAN<br>High | Aspirin      | Ibuprofen     | PCM           | Ranitidine    | 4-MBA         | 4-NTP         |
|-------------|--------------|---------------|---------------|---------------|---------------|---------------|
| Aspirin     | <b>8.555</b> | 9.806         | 10.239        | 17.339        | 11.369        | 6.581         |
| Ibuprofen   | 9.806        | <b>11.832</b> | 11.800        | 22.866        | 15.788        | 11.041        |
| PCM         | 10.239       | 11.800        | <b>15.786</b> | 22.521        | 15.903        | 13.891        |
| Ranitidine  | 17.339       | 22.866        | 22.521        | <b>23.426</b> | 19.815        | 23.693        |
| 4-MBA       | 11.369       | 15.788        | 15.903        | 19.815        | <b>16.610</b> | 16.229        |
| 4-NTP       | 6.581        | 11.041        | 13.891        | 23.693        | 16.229        | <b>12.011</b> |

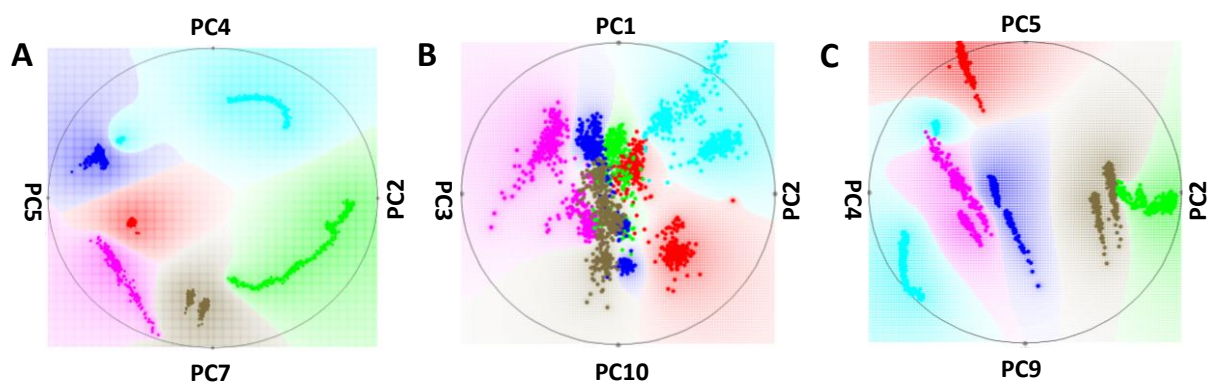

**Figure S14:** The RadViz clustering between different class of samples (A) high, (B) low-resolution, and (C) GAN-generated high-resolution Raman spectra showing different clustering efficiency. The clustering efficiency of GAN-generated high-resolution Raman spectra is significantly improved over its low-resolution counterpart. Aspirin (red), ibuprofen (blue), PCM (green), ranitidine (grey), 4-MBA (cyan), and 4-NTP (magenta).

## REFERENCES

- (1) Isola, P.; Zhu, J.-Y.; Zhou, T.; Efros, A. A. Image-to-image translation with conditional adversarial networks. 2017, pp 1125-1134.
- (2) Ma, X.; Wang, K.; Chou, K.; Li, Q.; Lu, X. Conditional Generative Adversarial Network for Spectral Recovery to Accelerate Single-Cell Raman Spectroscopic Analysis. *Analytical Chemistry* **2022**, 94 (2), 577-582, Article. DOI: 10.1021/acs.analchem.1c04263.
- (3) Da, K. A method for stochastic optimization. *arXiv preprint arXiv:1412.6980* **2014**.
- (4) MACKAY, D. BAYESIAN INTERPOLATION. *Neural Computation* **1992**, 4 (3), 415-447, Note. DOI: 10.1162/neco.1992.4.3.415.
- (5) Nasr, G. E.; Badr, E. A.; Joun, C. Cross entropy error function in neural networks: Forecasting gasoline demand. 2002, pp 381-384.
- (6) Aurelio, Y. S.; De Almeida, G. M.; de Castro, C. L.; Braga, A. P. Learning from imbalanced data sets with weighted cross-entropy function. *Neural processing letters* **2019**, 50, 1937-1949.
- (7) Qi, Y.; Hu, D.; Jiang, Y.; Wu, Z.; Zheng, M.; Chen, E.; Liang, Y.; Sadi, M.; Zhang, K.; Chen, Y. Recent Progresses in Machine Learning Assisted Raman Spectroscopy. *Advanced Optical Materials* **2023**, 11 (14), Review. DOI: 10.1002/adom.202203104.
- (8) Wang, Z.; Bovik, A.; Sheikh, H.; Simoncelli, E. Image quality assessment: From error visibility to structural similarity. *Ieee Transactions on Image Processing* **2004**, 13 (4), 600-612, Article. DOI: 10.1109/TIP.2003.819861.
- (9) Pan, L.; Pipitsunthonsan, P.; Zhang, P.; Daengngam, C.; Booranawong, A.; Chongcheawchamnan, M. Noise reduction technique for Raman spectrum using deep learning network. 2020, IEEE: pp 159-163.
- (10) Kassu, A.; Robinson, D. Vibrational Spectroscopy of Pain Relievers: Traditional and Remote Raman Techniques. *Journal of Analytical Sciences, Methods and Instrumentation* **2023**, 13 (3), 27-37.
- (11) Ramesh, P.; Gunasekaran, S.; Ramkumar, G. R. Molecular Structure, Vibrational Spectra, UV-Visible and NMR Spectral Analysis on Ranitidine Hydrochloride using AB Initio and DFT Methods. *International Journal of Current Research and Academic Review* **2015**, 3 (11), 117-138.
- (12) Thorley, F.; Baldwin, K.; Lee, D.; Batchelder, D. Dependence of the Raman spectra of drug substances upon laser excitation wavelength. *Journal of Raman Spectroscopy* **2006**, 37 (1-3), 335-341, Article. DOI: 10.1002/jrs.1446.
- (13) Chen, S.; Fan, J.; Lv, M.; Hua, C.; Liang, G.; Zhang, S. Internal Standard Assisted Surface-Enhanced Raman Scattering Nanoprobe with 4-NTP as Recognition Unit for Ratiometric Imaging Hydrogen Sulfide in Living Cells. *Analytical Chemistry* **2022**, Article|Early Access. DOI: 10.1021/acs.analchem.2c02961.
- (14) Marques, F.; Alves, R.; dos Santos, D.; Andrade, G. Surface-enhanced Raman spectroscopy of one and a few molecules of acid 4-mercaptobenzoic in AgNP enabled by hot spots generated by hydrogen bonding. *Physical Chemistry Chemical Physics* **2022**, 24 (44), 27449-27458, Article. DOI: 10.1039/d2cp03375e.
